# Supplementary material for: TMEM16 and OSCA/TMEM63 proteins share a conserved potential to permeate ions and phospholipids
Source: eLife. 2024 Nov 4;13:RP96957. doi: 10.7554/eLife.96957 (PMC11534332; doi:10.7554/eLife.96957)
Supplement: Figure 1—figure supplement 2—source data 1. [file elife-96957-fig1-figsupp2-data1.xlsx]

## Sheet: Sheet1
		Fig. 1 FS2b
		WT	I521A	I521E
		0	0	100
		0	0	100
		0	0	100
		0	0	100
		0	0	100
