# Supplementary material for: TMEM16 and OSCA/TMEM63 proteins share a conserved potential to permeate ions and phospholipids
Source: eLife. 2024 Nov 4;13:RP96957. doi: 10.7554/eLife.96957 (PMC11534332; doi:10.7554/eLife.96957)
Supplement: Figure 1—source data 1. [file elife-96957-fig1-data1.xlsx]

## Sheet: Sheet1
		Fig. 1c
		WT	I521K	M522K	T526K
		0	76.4706	88.8889	2.63158
		0	75	77.7778	8.69565
		0	76.1905	88.8889	0
		0	80.7692	96.6667	18.75
		0	76.3158	100	0
	Fig. 1c	Unpaired two-tailed t-test with Welch's correction
			I521K	M522K	T526K
	n	5	5	5	5
	SEM	0	0.98989	3.84258	3.55791
	Mean+SEM	0	77.9391	94.287	9.57335
	Mean-SEM	0	75.9593	86.6019	2.45754
	P value	0.1662	<0.0001	<0.0001
	Summary	ns	****	****
	Welch-corrected t	1.691	19.21	16.12
	Welch-corrected df	4	4.616	7.953
	95% CI	-3.863 to 15.89	-80.67 to -61.20	-96.52 to -72.34
	R2	0.4168	0.9876	0.9858
			Fig. 1e
		Test Potential (mV)	WT						I521K						M522K				T526K
		-100	-1.51319	-1.21499	-0.93684	-2.75606	-3.09101	-3.82745	-10.4349	-1.20219	-9.47214	-11.3354	-14.2872	-14.2853	-7.56151	-3.48861	-2.56905	-1.59501	-12.207	-9.74694	-11.1262	-9.1397	-20.0617	-20.8952	-19.6729
		-80	-0.6922	-0.63152	-0.4872	-2.11699	-2.38925	-2.93323	-4.87826	-0.36244	-3.59891	-4.54103	-6.70743	-6.11807	-3.84409	-1.475	-1.09863	-0.84162	-10.0356	-8.33005	-8.93729	-7.59825	-16.4141	-17.9446	-15.8174
		-60	0.045104	-0.0267	0.012989	-1.40057	-1.56886	-1.99856	0.337773	0.026516	0.582559	0.133326	-0.01957	-0.59079	-0.00173	0.031565	0.039324	0.042021	-8.08213	-6.57841	-7.9382	-6.36042	-12.8028	-14.1455	-12.1389
		-40	0.827967	0.624419	0.489454	-0.70803	-0.80168	-0.93503	2.47772	0.636672	2.76534	3.55241	4.92752	5.41592	2.64406	1.57099	1.21327	0.669509	-6.02806	-5.34836	-6.39416	-5.32501	-8.89369	-10.1362	-8.63075
		-20	1.58545	1.28355	0.974234	0.000857	-0.01507	-0.01915	5.92494	1.04298	5.46339	6.21145	9.78791	10.1657	5.20715	2.96602	2.49437	1.24706	-2.9763	-4.00154	-4.84103	-4.1806	-4.98454	-6.32928	-5.42913
		0	2.52454	1.94973	1.50205	0.708008	0.838864	0.984325	10.2875	1.57082	7.72769	8.26537	13.841	14.9561	7.47327	4.53219	4.44133	1.93616	-0.75456	-2.43673	-3.03359	-2.79485	-0.73388	-2.77928	-2.46593
		20	3.32739	2.60179	2.04904	1.62909	1.84049	1.93879	18.8563	2.16374	10.3799	10.3462	17.7241	19.064	9.80056	6.71896	6.20921	2.75016	0.989306	-1.45581	-1.48955	-1.34682	2.76838	0.638378	0.245231
		40	4.346	3.33913	2.68013	2.26871	2.83296	2.91418	25.1731	2.72664	12.7473	13.9093	22.7986	21.8111	12.2431	9.90212	7.98702	3.86275	2.4565	0.653948	0.2089	0.155702	6.40142	3.70571	3.07219
		60	5.3398	4.381	3.3846	2.71548	3.46738	3.83508	33.8985	3.87618	15.8588	20.1779	29.5859	24.8564	14.5955	16.4374	10.6657	6.30039	4.31773	1.8295	1.92551	1.48695	9.51858	6.77303	5.10897
		80	6.69939	5.50823	4.3458	3.40068	4.42711	5.82368	46.3979	7.80679	19.3256	25.7426	38.9651	29.9667	18.2796	29.2821	15.1264	10.7552	6.28796	3.53443	3.97818	3.19967	13.4786	9.23312	7.66345
		100	8.39305	6.76914	5.42465	4.08863	6.4479	7.32323	85.6215	15.0445	24.6705	35.4006	48.749	38.7054	22.4428	46.4794	22.23	13.951	9.09658	6.09573	6.56673	5.91667	17.0099	12.5262	10.0885
		120	10.3734	8.12871	6.87818	5.83394	7.47323	8.19485	165.149	60.7329	29.2225	63.8263	66.6029	50.9826	29.2302	64.1616	32.5972	22.3851	11.4273	8.18992	10.227	8.12764	20.4322	17.135	13.0585
		140	13.3126	10.3791	8.63158	6.57458	7.70416	8.91977	249.455	120.139	47.2892	96.2506	93.9831	88.1346	38.7294	86.5448	47.9367	35.5356	13.5736	11.0003	14.5685	14.9552	24.2687	20.3269	17.5817
		160	16.3983	12.6071	11.1422	8.07637	8.88151	10.5524	371.363	235.687	142.383	162.484	135.55	137.363	50.853	114.888	75.8361	50.9867	18.3776	15.3211	18.5558	16.4343	27.7565	27.2868	20.9808
		Fig. 1f (160 mV, 0 Ca2+)
		WT	I521K	M522K	T526K
		16.3983	371.363	137.363	18.3776
		12.6071	235.687	50.853	15.3211
		11.1422	142.383	114.888	18.5558
		8.07637	162.484	75.8361	16.4343
		8.88151	135.55	50.9867	27.7565
		10.5524			27.2868
					20.9808
	Fig. 1f (160 mV, 0 Ca2+)	Unpaired two-tailed t-test with Welch's correction
		WT	I521K	M522K	T526K
	n	6	5	5	7
	SEM	1.21823	44.198	17.3741	1.89217
	Mean+SEM	12.4945	253.691	103.359	22.5654
	Mean-SEM	10.0581	165.295	68.6112	18.7811
	P value	0.0019	0.0129	0.0193	0.0125
	Summary	**	*	*
	Welch-corrected t	4.176	4.268	3.737
	Welch-corrected df	9.953	4.015	4.095
	95% CI	4.379 to 14.41	-311.5 to -66.17	-113.4 to -17.23
	R2	0.6366	0.8194	0.7733
