# Supplementary material for: TMEM16 and OSCA/TMEM63 proteins share a conserved potential to permeate ions and phospholipids
Source: eLife. 2024 Nov 4;13:RP96957. doi: 10.7554/eLife.96957 (PMC11534332; doi:10.7554/eLife.96957)
Supplement: Figure 2—source data 1. [file elife-96957-fig2-data1.xlsx]

## Sheet: Sheet1
		Fig. 2c
		WT	I611K
		0	80
		0	78.5714
		0	100
		0	100
		0	100
	Fig. 2c	Unpaired two-tailed t-test with Welch's correction
		WT	I611K
	n	5	5
	SEM	0	5.07897
	Mean+SEM	0	96.7933
	Mean-SEM	0	86.6353
	P value		<0.0001
	Summary		****
	Welch-corrected t		18.06
	Welch-corrected df		4
	95% CI		77.61 to 105.8
	R2		0.9879
			Fig. 2e
		Test Potential (mV)	WT						I611K
		-100	-1.51319	-1.21499	-0.93684	-2.75606	-3.09101	-3.82745	-18.9511	-16.3813	-11.5318	-11.6044	-8.98292
		-80	-0.6922	-0.63152	-0.4872	-2.11699	-2.38925	-2.93323	-16.3816	-12.4249	-9.77279	-9.95444	-7.95096
		-60	0.045104	-0.0267	0.012989	-1.40057	-1.56886	-1.99856	-13.5214	-10.4304	-8.26813	-8.34079	-6.57245
		-40	0.827967	0.624419	0.489454	-0.70803	-0.80168	-0.93503	-11.3879	-7.46222	-5.92787	-6.0853	-5.08216
		-20	1.58545	1.28355	0.974234	0.000857	-0.01507	-0.01915	-8.42203	-3.8837	-3.18797	-3.51495	-2.9994
		0	2.52454	1.94973	1.50205	0.708008	0.838864	0.984325	-1.84955	0.145322	-0.39963	-0.72661	-0.68189
		20	3.32739	2.60179	2.04904	1.62909	1.84049	1.93879	3.93026	4.08715	2.7399	2.72779	2.42929
		40	4.346	3.33913	2.68013	2.26871	2.83296	2.91418	8.08511	9.06076	6.52127	6.71503	5.77523
		60	5.3398	4.381	3.3846	2.71548	3.46738	3.83508	11.2623	14.8336	10.787	10.6417	10.0266
		80	6.69939	5.50823	4.3458	3.40068	4.42711	5.82368	15.0869	20.7809	15.4161	15.4767	15.6866
		100	8.39305	6.76914	5.42465	4.08863	6.4479	7.32323	20.0608	27.8035	21.5469	22.6247	24.1076
		120	10.3734	8.12871	6.87818	5.83394	7.47323	8.19485	26.5937	36.3085	27.9561	31.3954	35.5356
		140	13.3126	10.3791	8.63158	6.57458	7.70416	8.91977	39.3886	45.9905	37.4051	43.1089	52.2065
		160	16.3983	12.6071	11.1422	8.07637	8.88151	10.5524	49.0789	59.1312	50.8624	60.2841	74.4219
		Fig. 2f (160 mV, 0 Ca2+)
		WT	I611K
		16.3983	49.0789
		12.6071	59.1312
		11.1422	50.8624
		8.07637	60.2841
		8.88151	74.4219
		10.5524
	Fig. 2f (160 mV, 0 Ca2+)	Unpaired two-tailed t-test with Welch's correction
		WT	I611K
	n	6	5
	SEM	1.21823	4.49361
	Mean+SEM	12.4945	63.2493
	Mean-SEM	10.0581	54.2621
	P value		0.0003
	Summary		***
	Welch-corrected t		10.2
	Welch-corrected df		4.59
	95% CI		35.18 to 59.78
	R2		0.9577
