# Supplementary material for: TMEM16 and OSCA/TMEM63 proteins share a conserved potential to permeate ions and phospholipids
Source: eLife. 2024 Nov 4;13:RP96957. doi: 10.7554/eLife.96957 (PMC11534332; doi:10.7554/eLife.96957)
Supplement: Figure 3—figure supplement 1—source data 1. [file elife-96957-fig3-figsupp1-data1.xlsx]

## Sheet: Sheet1
		Fig. 3 SF1b
		Time (s)	I546K
		0	1405.48
		2	1444.26
		4	1439.74
		6	1450.08
		8	1095
		10	759.702
		12	715.942
		14	674.155
		16	642.253
		18	642.951
		20	626.646
		22	634.112
		24	641.294
		26	640.477
		28	622.515
		30	691.049
		32	668.52
		34	698.264
		36	701.25
		38	717.904
		40	706.525
		42	716.509
		44	743.485
		46	727.386
		48	743.909
		50	760.989
		52	775.681
		54	785.773
		56	770.362
		58	795.506
		60	819.07
		62	798.253
		64	819.822
		66	828.084
		68	827.015
		70	837.707
		72	854.1
		74	866.743
		76	862.351
		78	873.838
		80	882.83
		82	893.762
		84	900.89
		86	907.985
		88	932.05
		90	950.078
		92	941.969
		94	958.001
		96	962.088
		98	968.279
		100	962.928
		102	975.015
		104	979.124
		106	1006.07
		108	1023.31
		110	1049.38
		112	1025.23
		114	1071.55
		116	1064.34
		118	1041.66
		120	1047.84
		122	1066.11
		124	1071.29
		126	1098.84
		128	1110.6
		130	1113.27
		132	1125.4
		134	1137.41
		136	1154.83
		138	1132.81
		140	1155.88
		142	1154.44
		144	1175.69
		146	1174.33
		148	1180.89
		150	1197.38
		152	1200.55
		154	1206.24
		156	1192.39
		158	1209.09
		160	1213.23
		162	1235.15
		164	1236.06
		166	1272.71
		168	1259.17
		170	1276.87
		172	1273.78
		174	1310.04
		176	1295.99
		178	1313.84
		180	1320.44
		182	1317.19
		184	1354.26
		186	1335.15
		188	1357.55
		Fig. 3 SF1c
		Bath	Ani9	Wash
		2743.2	1383.72	2827.55
		2315.88	908.396	2479.36
		2321.01	1241.04	2423.53
		1405.48	622.515	1357.55
		1543.59	590.79	1306.39
	Fig. 3 SF1c	Unpaired two-tailed t-test with Welch's correction
		Bath	Ani9	Wash
	n	5	5	5
	SEM	254.487	159.816	312.789
	Mean+SEM	2320.32	1109.11	2391.67
	Mean-SEM	1811.34	789.476	1766.09
	P value	0.008		0.0184
	Summary	**		*
	Welch-corrected t	3.716		3.216
	Welch-corrected df	6.73		5.955
	95% CI	-1833 to -400.1		268.5 to 1991
	R2	0.6723		0.6346
