# Supplementary material for: TMEM16 and OSCA/TMEM63 proteins share a conserved potential to permeate ions and phospholipids
Source: eLife. 2024 Nov 4;13:RP96957. doi: 10.7554/eLife.96957 (PMC11534332; doi:10.7554/eLife.96957)
Supplement: Figure 3—source data 1. [file elife-96957-fig3-data1.xlsx]

## Sheet: Sheet1
		Fig. 3c
		WT	I546K	I547K	E551K
		0	36.8347	28.5714	0
		0	32.7381	55.5556	0
		0	70.2381	57.1429	0
		0	57.0707	33.3333	0
					0
	Fig. 3c	Unpaired two-tailed t-test with Welch's correction
		WT	I546K	I547K	E551K
	n	4	4	4	4
	SEM	0	8.79603	7.40268	0
	Mean+SEM	0	58.0164	51.0535	0
	Mean-SEM	0	40.4244	36.2481	0
	P value		0.0113	0.0097
	Summary		*	**
	Welch-corrected t		5.596	5.897
	Welch-corrected df		3	3
	95% CI		21.23 to 77.21	20.09 to 67.21
	R2		0.9126	0.9206
		Fig. 3e
		Test Potential (mV)	WT														I546K					I547K					E551K
		-100	-4.07628	-4.26665	-4.05191	-8.13075	-4.42941	-4.33513	-5.0107	-5.05335	-3.96474	-3.49257	-4.61419	-5.06422	-3.67856	-3.89233	-76.6277	-17.5095	-38.1809	-61.7015	-116.657	-58.5116	-119.998	-246.574	-183.52	-126.879	-12.3069	-9.38574	-11.5028	-10.3166	-10.1195	-20.6884
		-80	-3.28881	-3.33659	-3.29539	-6.14711	-3.58945	-3.49317	-4.02832	-4.0735	-3.15094	-2.83256	-3.63827	-3.95881	-3.02333	-2.46148	-63.4829	-13.8601	-28.1652	-45.6196	-88.1921	-52.5137	-108.159	-215.327	-159.193	-112.788	-10.4268	-8.16981	-10.016	-8.63817	-8.55128	-16.3269
		-60	-2.57492	-2.64195	-2.46449	-4.48318	-2.78437	-2.68391	-3.21161	-3.16844	-2.41089	-2.09869	-2.63691	-2.92121	-2.03899	-1.82436	-46.73	-10.0708	-18.3317	-28.0118	-58.1977	-45.9876	-95.7743	-175.942	-132.119	-96.4876	-8.94637	-7.00951	-8.69555	-7.51919	-6.95123	-12.6203
		-40	-1.76566	-1.81071	-1.78746	-3.15712	-2.05485	-1.95912	-2.34259	-1.99112	-1.69754	-1.34302	-1.63396	-1.97686	-1.38675	-1.25417	-20.9014	-4.85738	-9.43714	-10.3087	-28.018	-38.8277	-79.2058	-129.505	-98.4846	-74.7271	-7.88371	-5.94457	-7.2088	-6.30697	-4.94851	-8.43048
		-20	-1.03814	-1.17129	-1.08735	-1.91461	-1.14804	-1.05722	-1.35731	-1.02772	-0.83542	-0.70844	-0.89804	-1.11389	-0.80483	-0.766955	19.6775	2.87374	0.273387	10.6846	4.6176	-28.1583	-53.6601	-70.8601	-56.3049	-43.9155	-6.30333	-4.64916	-5.89811	-5.28971	-2.98818	-4.32332
		0	-0.32152	-0.3139	-0.3898	-0.8901	-0.29355	-0.29428	-0.36621	0.435324	-0.12461	-0.19618	-0.20663	-0.2238	-0.21392	-0.23022	81.1259	16.187	11.1792	35.9376	40.1887	-11.3267	-14.2797	5.28124	-0.63215	3.18574	-5.0136	-2.69413	-3.35498	-2.95003	-0.18014	2.79744
		20	2.1662	2.27574	0.974511	0.16712	2.65067	1.55858	1.18292	3.27017	0.835419	0.564333	0.73274	0.651042	0.543033	0.421624	165.669	38.503	23.9881	67.6916	81.7017	18.5805	43.958	101.674	71.9016	68.5343	-1.29881	1.37488	1.8291	1.69542	4.02663	10.6939
		40	7.31877	3.96438	1.90799	1.89282	4.80724	2.76566	2.3949	4.40859	1.78019	1.42415	1.79291	1.78697	1.41368	1.2448	276.406	72.67	40.7028	107.218	132.508	67.9368	123.329	219.481	162.321	152.487	5.17709	10.101	12.9211	10.9863	10.5116	19.5821
		60	7.44138	4.02541	2.82095	4.05811	5.01942	3.61851	3.32496	4.60157	2.80126	2.38691	2.81652	2.98225	2.53416	2.2152	412.464	121.371	63.2159	154.342	195.52	145.193	226.377	359.378	273.688	253.579	18.4195	26.2578	34.3225	29.5512	22.3795	31.3568
		80	7.07354	5.22868	4.33401	7.22249	5.49316	4.673	4.6067	5.62182	4.25212	3.63183	4.78744	4.71666	4.49835	3.48409	568.517	181.885	97.8174	209.461	273.058	257.169	352.211	520.299	403.083	370.625	41.226	55.4323	71.7163	61.9083	40.849	48.612
		100	7.61032	7.07717	7.44475	11.891	6.85628	7.03267	7.35328	7.43791	6.21287	6.19797	7.20024	7.19537	6.46105	5.41018	748.03	255.775	137.471	278.424	361.041	403.184	498.568	697.454	549.523	498.624	80.2085	100.859	127.841	111.347	72.8289	74.1196
		120	10.7656	11.4543	12.5481	18.4886	9.41395	10.5476	11.2683	10.566	9.2659	9.15043	12.1037	12.2664	10.2114	8.85947	936.476	340.474	195.554	359.912	460.861	587.381	667.572	895.335	717.534	645.164	140.926	165.9	208.087	181.546	121.594	111.364
		140	16.0217	17.9065	20.7468	30.0634	14.0032	15.7847	17.2904	15.2483	14.5531	14.1531	18.7556	21.3725	17.4489	15.3043	1146.32	434.176	271.072	438.936	577.66	802.389	857.086	1114.28	908.061	803.375	224.213	251.897	313.069	272.793	199.71	165.354
		160	24.0925	29.5468	31.0587	46.7972	21.714	23.4304	26.4747	22.948	22.6148	23.6693	29.8834	33.6151	27.9131	26.0751	1368.17	536.524	350.944	532.886	695.256	1054.42	1069.11	1362.27	1121.51	983.235	337.346	364.598	446.779	391.21	311.767	239.677
		Fig. 3f (160 mV, 0 Ca2+)
		WT	I546K	I547K	E551K
		24.0925	1368.17	1054.42	337.346
		29.5468	536.524	1069.11	364.598
		31.0587	350.944	1362.27	446.779
		46.7972	532.886	1121.51	391.21
		21.714	695.256	983.235	311.767
		23.4304			239.677
		26.4747
		22.948
		22.6148
		23.6693
		29.8834
		33.6151
		27.9131
		26.0751
	Fig. 3f (160 mV, 0 Ca2+)	Unpaired two-tailed t-test with Welch's correction
		WT	I546K	I547K	E551K
	n	14	5	5	6
	SEM	1.74596	176.482	64.9136	28.9011
	Mean+SEM	29.5912	873.239	1183.02	377.464
	Mean-SEM	26.0993	520.275	1053.19	319.662
	P value		0.0193	<0.0001	<0.0001
	Summary		*	****
	Welch-corrected t		3.79	16.79	11.08
	Welch-corrected df		4.001	4.006	5.037
	95% CI		178.9 to 1159	910.1 to 1270	246.5 to 395.0
	R2		0.7822	0.986	0.9606
