# Supplementary material for: TMEM16 and OSCA/TMEM63 proteins share a conserved potential to permeate ions and phospholipids
Source: eLife. 2024 Nov 4;13:RP96957. doi: 10.7554/eLife.96957 (PMC11534332; doi:10.7554/eLife.96957)
Supplement: Figure 4—figure supplement 1—source data 1. [file elife-96957-fig4-figsupp1-data1.xlsx]

## Sheet: Sheet1
		Fig. 4 SF1b
		Time (ns)	WT	L438K
		0	0	6
		0.1	0	6
		0.2	1	6
		0.3	0	4
		0.4	0	5
		0.5	1	7
		0.6	0	6
		0.7	0	8
		0.8	0	7
		0.9	1	8
		1	0	8
		1.1	1	7
		1.2	1	10
		1.3	3	14
		1.4	2	14
		1.5	2	14
		1.6	3	13
		1.7	3	13
		1.8	3	14
		1.9	3	14
		2	3	15
		2.1	2	17
		2.2	2	15
		2.3	2	16
		2.4	3	10
		2.5	2	16
		2.6	3	11
		2.7	2	13
		2.8	2	12
		2.9	2	12
		3	2	14
		3.1	1	15
		3.2	1	12
		3.3	1	13
		3.4	3	12
		3.5	4	14
		3.6	3	13
		3.7	2	14
		3.8	1	13
		3.9	3	14
		4	3	16
		4.1	4	14
		4.2	3	14
		4.3	6	11
		4.4	5	10
		4.5	4	13
		4.6	5	12
		4.7	6	12
		4.8	1	14
		4.9	2	13
		5	2	14
		5.1	4	13
		5.2	3	13
		5.3	5	13
		5.4	3	12
		5.5	3	12
		5.6	3	12
		5.7	5	15
		5.8	2	13
		5.9	2	13
		6	2	14
		6.1	2	14
		6.2	3	12
		6.3	1	12
		6.4	2	12
		6.5	2	13
		6.6	1	13
		6.7	3	12
		6.8	3	12
		6.9	3	15
		7	4	16
		7.1	2	16
		7.2	3	12
		7.3	2	14
		7.4	2	12
		7.5	3	12
		7.6	2	14
		7.7	3	14
		7.8	2	17
		7.9	4	16
		8	4	17
		8.1	4	15
		8.2	4	15
		8.3	3	16
		8.4	3	15
		8.5	5	16
		8.6	5	13
		8.7	3	13
		8.8	4	17
		8.9	3	17
		9	5	16
		9.1	4	19
		9.2	5	20
		9.3	2	18
		9.4	2	20
		9.5	2	20
		9.6	1	20
		9.7	2	18
		9.8	2	19
		9.9	4	20
		10	3	16
		10.1	1	15
		10.2	4	16
		10.3	2	16
		10.4	4	15
		10.5	3	19
		10.6	2	16
		10.7	2	18
		10.8	3	16
		10.9	4	18
		11	3	15
		11.1	2	16
		11.2	3	17
		11.3	4	16
		11.4	1	17
		11.5	2	16
		11.6	1	17
		11.7	1	18
		11.8	3	16
		11.9	1	17
		12	2	16
		12.1	3	19
		12.2	3	17
		12.3	2	14
		12.4	1	14
		12.5	2	12
		12.6	1	14
		12.7	1	15
		12.8	2	14
		12.9	2	13
		13	2	12
		13.1	1	13
		13.2	3	12
		13.3	1	14
		13.4	2	13
		13.5	4	10
		13.6	4	15
		13.7	5	14
		13.8	4	11
		13.9	4	13
		14	4	14
		14.1	3	15
		14.2	6	15
		14.3	7	15
		14.4	4	17
		14.5	2	17
		14.6	1	15
		14.7	2	16
		14.8	0	17
		14.9	1	16
		15	4	16
		15.1	3	15
		15.2	3	12
		15.3	2	16
		15.4	2	16
		15.5	2	17
		15.6	2	16
		15.7	2	14
		15.8	3	14
		15.9	2	13
		16	2	15
		16.1	3	13
		16.2	3	14
		16.3	2	16
		16.4	2	17
		16.5	2	17
		16.6	3	14
		16.7	2	16
		16.8	3	16
		16.9	5	15
		17	3	15
		17.1	4	16
		17.2	5	13
		17.3	2	13
		17.4	3	14
		17.5	5	15
		17.6	3	17
		17.7	4	14
		17.8	3	13
		17.9	1	15
		18	2	15
		18.1	0	15
		18.2	1	17
		18.3	1	15
		18.4	2	17
		18.5	2	16
		18.6	1	17
		18.7	0	14
		18.8	0	15
		18.9	2	18
		19	2	18
		19.1	4	19
		19.2	2	16
		19.3	1	19
		19.4	0	19
		19.5	2	17
		19.6	4	16
		19.7	3	16
		19.8	1	17
		19.9	2	14
		20	2	15
		20.1	4	17
		20.2	6	14
		20.3	5	15
		20.4	1	14
		20.5	2	15
		20.6	0	18
		20.7	3	17
		20.8	0	16
		20.9	1	17
		21	3	18
		21.1	0	20
		21.2	0	16
		21.3	3	17
		21.4	0	20
		21.5	0	15
		21.6	1	17
		21.7	2	16
		21.8	2	17
		21.9	3	18
		22	5	17
		22.1	6	17
		22.2	4	19
		22.3	3	15
		22.4	4	17
		22.5	3	16
		22.6	3	19
		22.7	4	19
		22.8	4	18
		22.9	3	17
		23	4	15
		23.1	3	19
		23.2	2	19
		23.3	3	16
		23.4	4	17
		23.5	3	18
		23.6	1	21
		23.7	2	17
		23.8	2	18
		23.9	3	20
		24	3	17
		24.1	4	19
		24.2	3	21
		24.3	2	19
		24.4	3	18
		24.5	3	19
		24.6	2	18
		24.7	3	17
		24.8	2	16
		24.9	3	18
		25	2	16
		25.1	4	14
		25.2	3	17
		25.3	2	15
		25.4	3	16
		25.5	3	14
		25.6	5	15
		25.7	5	16
		25.8	3	17
		25.9	2	16
		26	3	15
		26.1	3	15
		26.2	2	17
		26.3	1	16
		26.4	1	16
		26.5	4	16
		26.6	6	17
		26.7	5	16
		26.8	4	17
		26.9	4	17
		27	4	15
		27.1	5	15
		27.2	4	17
		27.3	6	15
		27.4	5	16
		27.5	5	15
		27.6	3	16
		27.7	4	15
		27.8	5	15
		27.9	4	16
		28	5	16
		28.1	3	17
		28.2	3	14
		28.3	1	14
		28.4	3	13
		28.5	4	15
		28.6	5	16
		28.7	3	15
		28.8	4	15
		28.9	4	18
		29	4	18
		29.1	2	18
		29.2	3	17
		29.3	3	19
		29.4	4	18
		29.5	2	15
		29.6	2	14
		29.7	4	13
		29.8	3	14
		29.9	4	16
		30	4	15
		30.1	4	19
		30.2	4	15
		30.3	5	18
		30.4	3	15
		30.5	4	17
		30.6	4	15
		30.7	2	15
		30.8	6	15
		30.9	5	15
		31	6	15
		31.1	5	15
		31.2	6	14
		31.3	5	17
		31.4	5	16
		31.5	3	14
		31.6	5	17
		31.7	4	16
		31.8	3	14
		31.9	5	16
		32	4	14
		32.1	3	17
		32.2	4	16
		32.3	3	18
		32.4	3	18
		32.5	3	16
		32.6	4	14
		32.7	4	17
		32.8	5	19
		32.9	4	17
		33	4	17
		33.1	5	16
		33.2	4	17
		33.3	3	17
		33.4	6	18
		33.5	5	15
		33.6	3	16
		33.7	5	18
		33.8	4	16
		33.9	5	16
		34	4	16
		34.1	6	16
		34.2	6	15
		34.3	6	15
		34.4	6	16
		34.5	7	15
		34.6	5	17
		34.7	5	16
		34.8	4	16
		34.9	4	18
		35	6	13
		35.1	5	16
		35.2	5	17
		35.3	5	15
		35.4	5	16
		35.5	6	17
		35.6	5	18
		35.7	5	19
		35.8	4	13
		35.9	4	15
		36	5	14
		36.1	4	17
		36.2	6	15
		36.3	6	13
		36.4	4	15
		36.5	5	16
		36.6	5	20
		36.7	4	18
		36.8	5	20
		36.9	5	16
		37	5	19
		37.1	5	20
		37.2	6	17
		37.3	5	16
		37.4	5	16
		37.5	4	17
		37.6	4	20
		37.7	3	17
		37.8	4	17
		37.9	2	18
		38	3	16
		38.1	2	19
		38.2	3	16
		38.3	5	19
		38.4	6	20
		38.5	3	20
		38.6	3	18
		38.7	4	18
		38.8	3	19
		38.9	3	17
		39	4	16
		39.1	3	16
		39.2	4	16
		39.3	3	13
		39.4	1	16
		39.5	4	15
		39.6	4	16
		39.7	4	18
		39.8	4	17
		39.9	2	16
		40	5	18
		40.1	4	14
		40.2	4	14
		40.3	3	15
		40.4	1	17
		40.5	3	16
		40.6	2	16
		40.7	3	18
		40.8	2	16
		40.9	2	15
		41	2	15
		41.1	3	18
		41.2	2	16
		41.3	4	17
		41.4	3	16
		41.5	3	17
		41.6	3	16
		41.7	4	19
		41.8	2	17
		41.9	3	17
		42	3	18
		42.1	5	15
		42.2	4	15
		42.3	4	17
		42.4	4	16
		42.5	4	15
		42.6	5	17
		42.7	4	17
		42.8	4	17
		42.9	3	16
		43	5	13
		43.1	5	14
		43.2	4	18
		43.3	4	13
		43.4	5	14
		43.5	6	12
		43.6	6	13
		43.7	7	15
		43.8	5	15
		43.9	6	14
		44	4	15
		44.1	3	15
		44.2	6	15
		44.3	5	16
		44.4	5	16
		44.5	5	15
		44.6	3	16
		44.7	6	16
		44.8	7	15
		44.9	4	19
		45	5	17
		45.1	6	15
		45.2	2	15
		45.3	4	16
		45.4	6	16
		45.5	4	16
		45.6	6	15
		45.7	6	14
		45.8	5	15
		45.9	5	17
		46	6	15
		46.1	6	17
		46.2	8	17
		46.3	8	16
		46.4	12	17
		46.5	9	16
		46.6	9	16
		46.7	10	17
		46.8	10	18
		46.9	10	18
		47	11	16
		47.1	6	14
		47.2	11	15
		47.3	7	19
		47.4	10	17
		47.5	5	20
		47.6	5	21
		47.7	7	16
		47.8	5	14
		47.9	6	15
		48	6	17
		48.1	6	18
		48.2	4	18
		48.3	6	20
		48.4	5	19
		48.5	6	20
		48.6	5	18
		48.7	6	18
		48.8	5	17
		48.9	6	16
		49	4	19
		49.1	5	16
		49.2	4	15
		49.3	5	15
		49.4	2	16
		49.5	4	14
		49.6	2	14
		49.7	3	13
		49.8	3	14
		49.9	3	14
		50	3	14
		50.1	3	11
		50.2	4	8
		50.3	3	10
		50.4	3	16
		50.5	3	16
		50.6	4	15
		50.7	3	15
		50.8	2	18
		50.9	3	17
		51	3	15
		51.1	4	15
		51.2	2	16
		51.3	3	16
		51.4	4	17
		51.5	3	18
		51.6	2	16
		51.7	3	13
		51.8	3	17
		51.9	3	15
		52	5	20
		52.1	5	17
		52.2	4	15
		52.3	4	15
		52.4	5	15
		52.5	5	15
		52.6	4	16
		52.7	3	18
		52.8	4	18
		52.9	4	17
		53	3	16
		53.1	6	19
		53.2	3	19
		53.3	5	17
		53.4	3	14
		53.5	3	20
		53.6	3	21
		53.7	3	18
		53.8	3	18
		53.9	3	18
		54	2	17
		54.1	4	19
		54.2	3	19
		54.3	6	17
		54.4	3	18
		54.5	3	16
		54.6	5	16
		54.7	4	16
		54.8	2	15
		54.9	5	14
		55	4	16
		55.1	4	17
		55.2	5	17
		55.3	5	17
		55.4	6	15
		55.5	2	16
		55.6	4	17
		55.7	4	17
		55.8	3	16
		55.9	5	14
		56	3	14
		56.1	5	16
		56.2	5	15
		56.3	3	15
		56.4	3	15
		56.5	3	14
		56.6	4	14
		56.7	5	16
		56.8	3	19
		56.9	4	17
		57	4	15
		57.1	3	16
		57.2	4	18
		57.3	5	18
		57.4	4	16
		57.5	5	17
		57.6	3	21
		57.7	4	17
		57.8	7	20
		57.9	5	19
		58	5	16
		58.1	4	18
		58.2	4	14
		58.3	5	15
		58.4	5	16
		58.5	4	15
		58.6	5	15
		58.7	5	14
		58.8	4	15
		58.9	5	15
		59	3	15
		59.1	5	13
		59.2	4	15
		59.3	4	16
		59.4	4	20
		59.5	4	17
		59.6	5	19
		59.7	4	16
		59.8	2	19
		59.9	3	20
		60	4	17
		60.1	3	16
		60.2	4	18
		60.3	2	16
		60.4	4	18
		60.5	2	21
		60.6	4	18
		60.7	4	20
		60.8	3	21
		60.9	5	18
		61	4	18
		61.1	4	15
		61.2	2	17
		61.3	2	16
		61.4	2	15
		61.5	2	15
		61.6	3	15
		61.7	5	13
		61.8	3	14
		61.9	4	13
		62	3	13
		62.1	4	14
		62.2	4	13
		62.3	2	12
		62.4	3	11
		62.5	3	14
		62.6	3	14
		62.7	3	13
		62.8	3	15
		62.9	3	13
		63	3	15
		63.1	4	16
		63.2	4	14
		63.3	5	18
		63.4	2	15
		63.5	4	14
		63.6	4	13
		63.7	4	15
		63.8	3	13
		63.9	3	13
		64	4	13
		64.1	3	11
		64.2	4	13
		64.3	3	12
		64.4	4	14
		64.5	5	15
		64.6	4	12
		64.7	5	13
		64.8	5	12
		64.9	3	14
		65	4	13
		65.1	5	13
		65.2	5	15
		65.3	5	15
		65.4	6	12
		65.5	6	13
		65.6	5	15
		65.7	5	14
		65.8	5	14
		65.9	5	15
		66	5	14
		66.1	6	16
		66.2	6	11
		66.3	5	16
		66.4	6	15
		66.5	5	15
		66.6	4	15
		66.7	4	14
		66.8	4	14
		66.9	5	13
		67	2	13
		67.1	4	17
		67.2	4	18
		67.3	4	16
		67.4	4	18
		67.5	5	16
		67.6	5	16
		67.7	5	15
		67.8	6	14
		67.9	6	18
		68	5	13
		68.1	4	14
		68.2	5	14
		68.3	6	13
		68.4	7	15
		68.5	5	15
		68.6	5	17
		68.7	6	15
		68.8	6	17
		68.9	7	18
		69	6	20
		69.1	5	18
		69.2	6	14
		69.3	8	17
		69.4	6	15
		69.5	7	18
		69.6	7	15
		69.7	6	18
		69.8	8	17
		69.9	6	18
		70	6	15
		70.1	6	16
		70.2	8	18
		70.3	6	16
		70.4	6	14
		70.5	6	15
		70.6	6	15
		70.7	5	19
		70.8	6	19
		70.9	8	15
		71	8	16
		71.1	6	19
		71.2	5	18
		71.3	5	18
		71.4	6	16
		71.5	6	15
		71.6	9	16
		71.7	8	15
		71.8	7	13
		71.9	6	13
		72	6	16
		72.1	5	13
		72.2	7	13
		72.3	9	16
		72.4	6	15
		72.5	7	15
		72.6	8	18
		72.7	7	21
		72.8	6	17
		72.9	6	15
		73	8	13
		73.1	8	15
		73.2	7	16
		73.3	7	15
		73.4	5	16
		73.5	4	14
		73.6	5	14
		73.7	3	17
		73.8	4	16
		73.9	2	16
		74	4	18
		74.1	4	18
		74.2	3	18
		74.3	4	16
		74.4	4	18
		74.5	4	15
		74.6	4	15
		74.7	3	18
		74.8	4	16
		74.9	3	13
		75	3	15
		75.1	5	14
		75.2	3	15
		75.3	5	13
		75.4	5	17
		75.5	5	14
		75.6	3	13
		75.7	5	14
		75.8	6	14
		75.9	6	13
		76	5	14
		76.1	5	17
		76.2	5	15
		76.3	6	14
		76.4	7	14
		76.5	7	20
		76.6	7	16
		76.7	5	13
		76.8	5	18
		76.9	4	18
		77	5	17
		77.1	8	18
		77.2	7	17
		77.3	9	15
		77.4	6	15
		77.5	5	15
		77.6	9	14
		77.7	8	17
		77.8	7	18
		77.9	7	19
		78	6	19
		78.1	6	17
		78.2	6	18
		78.3	6	20
		78.4	6	17
		78.5	6	19
		78.6	7	19
		78.7	6	21
		78.8	5	22
		78.9	6	22
		79	6	20
		79.1	5	20
		79.2	6	20
		79.3	5	17
		79.4	5	20
		79.5	5	22
		79.6	6	18
		79.7	7	16
		79.8	6	20
		79.9	4	18
		80	6	19
		80.1	6	20
		80.2	7	18
		80.3	8	18
		80.4	5	18
		80.5	5	21
		80.6	5	19
		80.7	5	21
		80.8	6	21
		80.9	7	20
		81	5	21
		81.1	7	18
		81.2	5	16
		81.3	8	17
		81.4	6	18
		81.5	6	17
		81.6	6	20
		81.7	7	16
		81.8	7	15
		81.9	5	18
		82	6	14
		82.1	4	20
		82.2	8	19
		82.3	8	18
		82.4	6	17
		82.5	8	19
		82.6	7	22
		82.7	6	17
		82.8	6	20
		82.9	5	16
		83	5	16
		83.1	6	19
		83.2	5	13
		83.3	6	15
		83.4	8	15
		83.5	7	18
		83.6	6	16
		83.7	4	15
		83.8	6	13
		83.9	5	16
		84	6	16
		84.1	3	15
		84.2	6	19
		84.3	8	17
		84.4	7	16
		84.5	9	16
		84.6	11	17
		84.7	6	15
		84.8	6	17
		84.9	6	16
		85	8	16
		85.1	4	17
		85.2	5	17
		85.3	6	17
		85.4	7	15
		85.5	5	17
		85.6	5	16
		85.7	5	15
		85.8	3	17
		85.9	5	16
		86	5	18
		86.1	2	19
		86.2	4	17
		86.3	3	19
		86.4	6	17
		86.5	9	18
		86.6	5	16
		86.7	7	15
		86.8	6	15
		86.9	5	17
		87	4	15
		87.1	5	15
		87.2	4	15
		87.3	6	18
		87.4	4	18
		87.5	3	18
		87.6	4	17
		87.7	5	16
		87.8	5	13
		87.9	5	17
		88	5	17
		88.1	3	20
		88.2	4	17
		88.3	5	16
		88.4	2	15
		88.5	3	21
		88.6	4	19
		88.7	4	19
		88.8	5	22
		88.9	5	24
		89	4	18
		89.1	3	20
		89.2	4	20
		89.3	3	18
		89.4	3	20
		89.5	4	22
		89.6	3	22
		89.7	4	16
		89.8	3	18
		89.9	2	18
		90	6	21
		90.1	5	22
		90.2	4	17
		90.3	5	19
		90.4	5	16
		90.5	5	15
		90.6	4	16
		90.7	3	17
		90.8	5	17
		90.9	5	17
		91	4	16
		91.1	4	19
		91.2	5	17
		91.3	5	18
		91.4	6	19
		91.5	4	19
		91.6	3	16
		91.7	7	19
		91.8	5	19
		91.9	6	14
		92	7	18
		92.1	6	19
		92.2	6	17
		92.3	5	15
		92.4	6	16
		92.5	4	17
		92.6	3	19
		92.7	5	16
		92.8	4	17
		92.9	4	17
		93	2	16
		93.1	2	17
		93.2	4	18
		93.3	3	16
		93.4	3	17
		93.5	4	17
		93.6	5	17
		93.7	5	15
		93.8	6	15
		93.9	5	15
		94	4	14
		94.1	3	16
		94.2	3	14
		94.3	3	14
		94.4	1	14
		94.5	2	11
		94.6	1	11
		94.7	2	12
		94.8	3	12
		94.9	2	13
		95	4	14
		95.1	3	11
		95.2	4	12
		95.3	5	11
		95.4	4	14
		95.5	3	12
		95.6	3	10
		95.7	4	15
		95.8	5	13
		95.9	5	14
		96	3	15
		96.1	6	18
		96.2	4	14
		96.3	5	15
		96.4	5	18
		96.5	5	14
		96.6	7	16
		96.7	6	17
		96.8	4	16
		96.9	6	17
		97	4	20
		97.1	7	18
		97.2	8	20
		97.3	5	16
		97.4	7	17
		97.5	7	17
		97.6	5	20
		97.7	5	23
		97.8	7	21
		97.9	6	21
		98	5	22
		98.1	6	21
		98.2	4	20
		98.3	4	16
		98.4	6	13
		98.5	5	16
		98.6	6	18
		98.7	4	15
		98.8	3	14
		98.9	3	14
		99	4	14
		99.1	3	14
		99.2	3	15
		99.3	3	14
		99.4	5	15
		99.5	2	15
		99.6	3	16
		99.7	3	18
		99.8	3	16
		99.9	3	18
		100	2	15
		100.1	5	18
		100.2	5	20
		100.3	3	21
		100.4	5	21
		100.5	3	18
		100.6	4	18
		100.7	3	20
		100.8	5	19
		100.9	2	17
		101	4	18
		101.1	4	19
		101.2	4	18
		101.3	3	16
		101.4	3	14
		101.5	3	16
		101.6	4	14
		101.7	3	16
		101.8	3	17
		101.9	3	18
		102	3	15
		102.1	3	17
		102.2	3	18
		102.3	3	17
		102.4	4	16
		102.5	4	17
		102.6	3	16
		102.7	3	14
		102.8	6	14
		102.9	2	13
		103	3	15
		103.1	3	13
		103.2	3	15
		103.3	5	14
		103.4	2	14
		103.5	2	17
		103.6	4	16
		103.7	5	16
		103.8	5	15
		103.9	4	15
		104	3	13
		104.1	4	13
		104.2	5	14
		104.3	4	16
		104.4	3	18
		104.5	4	19
		104.6	5	20
		104.7	3	18
		104.8	4	19
		104.9	3	21
		105	3	18
		105.1	1	17
		105.2	3	19
		105.3	3	21
		105.4	2	20
		105.5	4	17
		105.6	2	19
		105.7	2	20
		105.8	3	21
		105.9	3	21
		106	3	22
		106.1	4	20
		106.2	3	24
		106.3	3	17
		106.4	2	22
		106.5	3	16
		106.6	4	16
		106.7	4	19
		106.8	4	20
		106.9	3	19
		107	5	16
		107.1	6	18
		107.2	7	19
		107.3	7	19
		107.4	6	20
		107.5	4	20
		107.6	4	19
		107.7	6	21
		107.8	6	23
		107.9	6	22
		108	6	20
		108.1	6	19
		108.2	5	20
		108.3	5	16
		108.4	6	18
		108.5	3	20
		108.6	5	16
		108.7	6	22
		108.8	4	20
		108.9	3	17
		109	3	20
		109.1	3	20
		109.2	4	16
		109.3	4	17
		109.4	7	18
		109.5	2	19
		109.6	2	18
		109.7	3	19
		109.8	3	23
		109.9	4	19
		110	6	21
		110.1	6	18
		110.2	4	21
		110.3	3	19
		110.4	4	22
		110.5	4	24
		110.6	4	23
		110.7	6	21
		110.8	5	20
		110.9	5	19
		111	3	22
		111.1	2	21
		111.2	4	19
		111.3	4	18
		111.4	2	19
		111.5	1	21
		111.6	1	21
		111.7	3	21
		111.8	3	21
		111.9	2	20
		112	3	21
		112.1	3	20
		112.2	3	20
		112.3	3	22
		112.4	5	23
		112.5	3	27
		112.6	3	24
		112.7	4	22
		112.8	4	23
		112.9	4	27
		113	3	23
		113.1	3	24
		113.2	6	22
		113.3	4	22
		113.4	5	19
		113.5	5	21
		113.6	6	22
		113.7	6	21
		113.8	5	23
		113.9	4	25
		114	4	20
		114.1	2	21
		114.2	5	22
		114.3	4	21
		114.4	6	19
		114.5	6	21
		114.6	4	25
		114.7	5	22
		114.8	4	26
		114.9	2	25
		115	4	23
		115.1	5	25
		115.2	4	19
		115.3	5	19
		115.4	5	19
		115.5	5	22
		115.6	4	19
		115.7	2	18
		115.8	3	20
		115.9	3	19
		116	5	21
		116.1	3	22
		116.2	4	15
		116.3	2	18
		116.4	2	16
		116.5	3	21
		116.6	4	22
		116.7	4	20
		116.8	2	20
		116.9	2	21
		117	3	22
		117.1	4	24
		117.2	5	23
		117.3	4	21
		117.4	6	22
		117.5	8	22
		117.6	7	18
		117.7	8	22
		117.8	9	21
		117.9	3	22
		118	6	21
		118.1	6	19
		118.2	5	19
		118.3	7	22
		118.4	9	22
		118.5	8	26
		118.6	6	22
		118.7	3	23
		118.8	5	24
		118.9	3	25
		119	5	26
		119.1	7	27
		119.2	6	26
		119.3	3	25
		119.4	5	26
		119.5	2	23
		119.6	4	20
		119.7	4	22
		119.8	3	23
		119.9	4	21
		120	2	24
		120.1	2	20
		120.2	4	21
		120.3	4	23
		120.4	4	19
		120.5	2	20
		120.6	4	22
		120.7	4	20
		120.8	3	22
		120.9	5	22
		121	4	24
		121.1	3	20
		121.2	4	20
		121.3	4	22
		121.4	4	22
		121.5	3	24
		121.6	4	21
		121.7	3	19
		121.8	4	20
		121.9	5	22
		122	5	25
		122.1	2	24
		122.2	3	23
		122.3	3	23
		122.4	4	24
		122.5	3	20
		122.6	2	18
		122.7	4	19
		122.8	3	21
		122.9	3	21
		123	4	20
		123.1	5	19
		123.2	6	19
		123.3	5	19
		123.4	5	15
		123.5	4	18
		123.6	3	17
		123.7	4	16
		123.8	6	18
		123.9	3	18
		124	5	20
		124.1	5	17
		124.2	3	16
		124.3	3	17
		124.4	2	21
		124.5	3	16
		124.6	2	17
		124.7	3	14
		124.8	4	13
		124.9	3	17
		125	3	17
		125.1	6	16
		125.2	5	18
		125.3	4	19
		125.4	6	17
		125.5	4	17
		125.6	6	19
		125.7	3	16
		125.8	2	19
		125.9	4	18
		126	4	18
		126.1	4	15
		126.2	2	21
		126.3	4	19
		126.4	6	20
		126.5	4	22
		126.6	4	20
		126.7	4	17
		126.8	4	19
		126.9	4	20
		127	4	17
		127.1	5	14
		127.2	5	17
		127.3	5	15
		127.4	6	16
		127.5	6	18
		127.6	6	15
		127.7	6	16
		127.8	7	16
		127.9	5	16
		128	6	18
		128.1	5	21
		128.2	6	17
		128.3	4	18
		128.4	2	18
		128.5	3	18
		128.6	4	19
		128.7	4	17
		128.8	6	16
		128.9	6	16
		129	6	16
		129.1	5	19
		129.2	6	17
		129.3	5	19
		129.4	5	19
		129.5	6	15
		129.6	5	17
		129.7	6	14
		129.8	5	15
		129.9	5	17
		130	5	17
		130.1	4	16
		130.2	5	15
		130.3	5	16
		130.4	6	14
		130.5	4	14
		130.6	3	14
		130.7	5	15
		130.8	5	18
		130.9	6	17
		131	5	17
		131.1	4	20
		131.2	4	14
		131.3	5	16
		131.4	4	18
		131.5	5	13
		131.6	2	18
		131.7	2	19
		131.8	1	15
		131.9	2	16
		132	2	14
		132.1	2	13
		132.2	2	13
		132.3	2	16
		132.4	2	15
		132.5	4	14
		132.6	2	17
		132.7	3	17
		132.8	2	18
		132.9	2	16
		133	3	22
		133.1	3	16
		133.2	3	16
		133.3	1	18
		133.4	3	19
		133.5	3	18
		133.6	2	14
		133.7	3	13
		133.8	3	14
		133.9	3	16
		134	3	17
		134.1	3	15
		134.2	3	15
		134.3	4	15
		134.4	3	14
		134.5	4	15
		134.6	3	16
		134.7	4	14
		134.8	4	13
		134.9	4	10
		135	4	13
		135.1	3	14
		135.2	3	12
		135.3	3	13
		135.4	3	12
		135.5	3	12
		135.6	3	15
		135.7	2	14
		135.8	2	15
		135.9	2	15
		136	3	14
		136.1	3	17
		136.2	3	16
		136.3	4	13
		136.4	4	17
		136.5	4	17
		136.6	4	14
		136.7	3	14
		136.8	3	14
		136.9	3	16
		137	2	15
		137.1	4	15
		137.2	3	14
		137.3	3	15
		137.4	5	14
		137.5	4	14
		137.6	4	13
		137.7	5	16
		137.8	4	15
		137.9	5	12
		138	4	13
		138.1	5	12
		138.2	5	14
		138.3	5	14
		138.4	4	17
		138.5	5	18
		138.6	3	19
		138.7	4	18
		138.8	5	20
		138.9	3	17
		139	4	18
		139.1	5	13
		139.2	6	18
		139.3	6	19
		139.4	5	18
		139.5	5	22
		139.6	3	19
		139.7	4	22
		139.8	2	21
		139.9	3	21
		140	1	16
		140.1	2	18
		140.2	4	19
		140.3	4	21
		140.4	5	19
		140.5	3	22
		140.6	3	20
		140.7	4	20
		140.8	4	19
		140.9	4	22
		141	4	21
		141.1	3	22
		141.2	3	21
		141.3	2	19
		141.4	4	20
		141.5	4	18
		141.6	3	19
		141.7	5	17
		141.8	4	17
		141.9	3	18
		142	2	16
		142.1	3	18
		142.2	3	17
		142.3	3	15
		142.4	2	15
		142.5	2	13
		142.6	3	14
		142.7	3	14
		142.8	3	17
		142.9	2	14
		143	1	16
		143.1	3	16
		143.2	2	12
		143.3	1	15
		143.4	4	14
		143.5	3	15
		143.6	2	14
		143.7	2	14
		143.8	3	15
		143.9	2	13
		144	1	15
		144.1	2	15
		144.2	3	18
		144.3	3	19
		144.4	2	19
		144.5	4	22
		144.6	5	20
		144.7	4	18
		144.8	5	18
		144.9	5	19
		145	4	20
		145.1	5	24
		145.2	6	17
		145.3	4	17
		145.4	4	19
		145.5	4	18
		145.6	6	22
		145.7	6	19
		145.8	6	17
		145.9	4	18
		146	6	21
		146.1	6	21
		146.2	6	18
		146.3	4	19
		146.4	5	16
		146.5	6	20
		146.6	5	19
		146.7	6	17
		146.8	6	18
		146.9	6	18
		147	6	17
		147.1	5	20
		147.2	5	18
		147.3	5	20
		147.4	6	20
		147.5	5	17
		147.6	4	18
		147.7	4	21
		147.8	6	19
		147.9	4	20
		148	4	19
		148.1	5	18
		148.2	5	17
		148.3	6	21
		148.4	4	24
		148.5	7	22
		148.6	7	21
		148.7	6	21
		148.8	6	20
		148.9	6	22
		149	5	21
		149.1	6	21
		149.2	4	18
		149.3	3	19
		149.4	5	20
		149.5	6	19
		149.6	5	20
		149.7	5	20
		149.8	5	18
		149.9	4	18
		150	4	22
		150.1	5	18
		150.2	6	18
		150.3	4	16
		150.4	6	21
		150.5	6	19
		150.6	6	17
		150.7	6	20
		150.8	6	20
		150.9	5	20
		151	6	20
		151.1	7	19
		151.2	7	17
		151.3	5	20
		151.4	5	20
		151.5	6	18
		151.6	5	14
		151.7	5	16
		151.8	5	17
		151.9	5	22
		152	4	16
		152.1	5	18
		152.2	5	21
		152.3	5	21
		152.4	4	19
		152.5	6	19
		152.6	4	21
		152.7	5	19
		152.8	6	19
		152.9	3	22
		153	4	18
		153.1	6	17
		153.2	5	19
		153.3	4	21
		153.4	4	20
		153.5	3	16
		153.6	2	19
		153.7	3	19
		153.8	4	20
		153.9	3	18
		154	3	16
		154.1	3	18
		154.2	3	16
		154.3	5	17
		154.4	5	18
		154.5	4	20
		154.6	5	19
		154.7	4	16
		154.8	4	20
		154.9	6	20
		155	5	23
		155.1	6	22
		155.2	6	19
		155.3	5	18
		155.4	5	21
		155.5	5	18
		155.6	3	18
		155.7	4	20
		155.8	6	18
		155.9	4	18
		156	5	21
		156.1	5	21
		156.2	6	19
		156.3	4	17
		156.4	5	17
		156.5	5	18
		156.6	4	19
		156.7	2	18
		156.8	3	18
		156.9	4	19
		157	4	16
		157.1	4	16
		157.2	3	19
		157.3	4	15
		157.4	3	18
		157.5	5	22
		157.6	3	20
		157.7	3	19
		157.8	3	20
		157.9	4	21
		158	4	15
		158.1	5	15
		158.2	5	14
		158.3	4	16
		158.4	3	16
		158.5	4	19
		158.6	4	22
		158.7	3	20
		158.8	4	18
		158.9	5	19
		159	5	18
		159.1	5	19
		159.2	5	19
		159.3	3	15
		159.4	3	20
		159.5	4	20
		159.6	5	16
		159.7	4	16
		159.8	4	13
		159.9	5	13
		160	4	16
		160.1	3	17
		160.2	5	16
		160.3	6	16
		160.4	3	20
		160.5	4	20
		160.6	5	16
		160.7	2	15
		160.8	3	14
		160.9	4	13
		161	6	17
		161.1	5	16
		161.2	4	15
		161.3	4	16
		161.4	3	15
		161.5	3	13
		161.6	4	17
		161.7	5	17
		161.8	4	15
		161.9	5	17
		162	5	14
		162.1	5	16
		162.2	5	16
		162.3	5	16
		162.4	6	19
		162.5	4	17
		162.6	3	18
		162.7	3	17
		162.8	4	17
		162.9	4	15
		163	3	17
		163.1	4	17
		163.2	5	18
		163.3	5	17
		163.4	4	14
		163.5	5	16
		163.6	8	17
		163.7	7	17
		163.8	5	18
		163.9	3	19
		164	2	16
		164.1	4	14
		164.2	2	16
		164.3	2	16
		164.4	3	18
		164.5	1	16
		164.6	3	15
		164.7	5	16
		164.8	5	19
		164.9	3	19
		165	5	15
		165.1	5	12
		165.2	4	14
		165.3	6	14
		165.4	5	14
		165.5	6	14
		165.6	6	14
		165.7	5	14
		165.8	7	12
		165.9	6	12
		166	7	12
		166.1	7	15
		166.2	7	13
		166.3	7	14
		166.4	8	15
		166.5	7	18
		166.6	9	16
		166.7	9	15
		166.8	11	18
		166.9	10	16
		167	7	17
		167.1	8	15
		167.2	6	20
		167.3	6	22
		167.4	7	19
		167.5	6	17
		167.6	4	16
		167.7	6	15
		167.8	3	19
		167.9	3	18
		168	4	13
		168.1	3	16
		168.2	5	14
		168.3	4	14
		168.4	6	14
		168.5	5	13
		168.6	8	13
		168.7	6	17
		168.8	6	15
		168.9	6	14
		169	5	18
		169.1	6	18
		169.2	6	15
		169.3	8	14
		169.4	5	16
		169.5	5	15
		169.6	6	11
		169.7	4	14
		169.8	6	16
		169.9	6	18
		170	5	16
		170.1	7	18
		170.2	7	12
		170.3	4	18
		170.4	7	16
		170.5	7	15
		170.6	8	15
		170.7	7	15
		170.8	6	16
		170.9	7	17
		171	7	18
		171.1	7	16
		171.2	8	17
		171.3	8	17
		171.4	8	15
		171.5	9	13
		171.6	8	12
		171.7	8	14
		171.8	7	10
		171.9	5	12
		172	6	15
		172.1	6	14
		172.2	7	14
		172.3	7	17
		172.4	8	16
		172.5	5	17
		172.6	5	16
		172.7	6	13
		172.8	8	14
		172.9	7	13
		173	6	16
		173.1	8	16
		173.2	6	17
		173.3	6	14
		173.4	6	19
		173.5	6	12
		173.6	6	14
		173.7	6	16
		173.8	5	16
		173.9	6	14
		174	6	14
		174.1	7	15
		174.2	5	11
		174.3	7	13
		174.4	8	14
		174.5	7	13
		174.6	6	16
		174.7	7	15
		174.8	3	17
		174.9	6	18
		175	2	19
		175.1	4	18
		175.2	3	15
		175.3	4	14
		175.4	5	13
		175.5	4	13
		175.6	3	15
		175.7	5	13
		175.8	6	15
		175.9	7	13
		176	4	16
		176.1	5	13
		176.2	4	14
		176.3	5	16
		176.4	6	14
		176.5	5	17
		176.6	5	20
		176.7	7	19
		176.8	6	19
		176.9	5	21
		177	5	14
		177.1	5	20
		177.2	5	20
		177.3	4	18
		177.4	4	19
		177.5	5	18
		177.6	6	21
		177.7	5	19
		177.8	4	20
		177.9	5	17
		178	3	18
		178.1	5	17
		178.2	5	19
		178.3	6	20
		178.4	5	21
		178.5	4	21
		178.6	6	16
		178.7	5	19
		178.8	5	19
		178.9	6	17
		179	5	19
		179.1	5	21
		179.2	5	21
		179.3	3	20
		179.4	3	19
		179.5	5	18
		179.6	5	20
		179.7	5	17
		179.8	5	22
		179.9	4	19
		180	6	17
		180.1	6	18
		180.2	6	19
		180.3	5	18
		180.4	5	18
		180.5	4	17
		180.6	3	22
		180.7	4	20
		180.8	3	19
		180.9	3	18
		181	4	19
		181.1	3	18
		181.2	3	19
		181.3	2	19
		181.4	3	21
		181.5	4	16
		181.6	4	18
		181.7	6	16
		181.8	4	14
		181.9	8	19
		182	6	14
		182.1	8	14
		182.2	8	16
		182.3	8	15
		182.4	7	19
		182.5	7	19
		182.6	7	22
		182.7	7	20
		182.8	5	18
		182.9	6	21
		183	7	14
		183.1	8	13
		183.2	8	14
		183.3	5	17
		183.4	5	19
		183.5	6	18
		183.6	8	19
		183.7	6	15
		183.8	5	15
		183.9	6	16
		184	7	16
		184.1	6	17
		184.2	6	20
		184.3	7	18
		184.4	6	19
		184.5	5	15
		184.6	5	17
		184.7	6	16
		184.8	4	16
		184.9	5	17
		185	5	15
		185.1	4	16
		185.2	6	14
		185.3	6	15
		185.4	7	17
		185.5	7	17
		185.6	8	13
		185.7	6	15
		185.8	4	19
		185.9	5	17
		186	5	14
		186.1	5	17
		186.2	6	18
		186.3	7	19
		186.4	6	21
		186.5	6	18
		186.6	7	16
		186.7	5	21
		186.8	4	20
		186.9	4	16
		187	6	20
		187.1	7	22
		187.2	9	17
		187.3	4	20
		187.4	5	22
		187.5	5	19
		187.6	4	17
		187.7	4	15
		187.8	3	14
		187.9	5	15
		188	6	16
		188.1	5	17
		188.2	9	15
		188.3	8	20
		188.4	6	17
		188.5	4	17
		188.6	4	19
		188.7	5	16
		188.8	5	12
		188.9	5	17
		189	5	18
		189.1	4	17
		189.2	3	18
		189.3	5	18
		189.4	3	19
		189.5	3	19
		189.6	3	18
		189.7	4	19
		189.8	4	17
		189.9	5	18
		190	4	21
		190.1	4	19
		190.2	6	20
		190.3	5	19
		190.4	5	18
		190.5	6	18
		190.6	5	18
		190.7	4	20
		190.8	6	16
		190.9	7	16
		191	6	18
		191.1	5	18
		191.2	7	16
		191.3	9	17
		191.4	7	22
		191.5	6	21
		191.6	7	18
		191.7	8	19
		191.8	7	17
		191.9	8	20
		192	6	20
		192.1	8	18
		192.2	7	18
		192.3	7	16
		192.4	6	15
		192.5	6	17
		192.6	5	16
		192.7	5	18
		192.8	7	16
		192.9	7	17
		193	8	20
		193.1	7	18
		193.2	8	16
		193.3	7	18
		193.4	7	20
		193.5	7	18
		193.6	5	16
		193.7	5	17
		193.8	4	19
		193.9	6	20
		194	5	18
		194.1	6	19
		194.2	6	16
		194.3	7	21
		194.4	8	18
		194.5	5	21
		194.6	5	25
		194.7	6	21
		194.8	5	19
		194.9	5	20
		195	4	20
		195.1	6	19
		195.2	8	15
		195.3	7	17
		195.4	7	20
		195.5	7	19
		195.6	9	20
		195.7	6	20
		195.8	7	18
		195.9	7	20
		196	7	21
		196.1	6	20
		196.2	8	21
		196.3	7	18
		196.4	8	18
		196.5	6	23
		196.6	7	23
		196.7	5	23
		196.8	5	21
		196.9	6	24
		197	6	21
		197.1	6	21
		197.2	2	22
		197.3	4	22
		197.4	5	19
		197.5	3	20
		197.6	4	20
		197.7	4	20
		197.8	1	19
		197.9	2	26
		198	3	21
		198.1	2	20
		198.2	2	22
		198.3	3	22
		198.4	3	23
		198.5	2	22
		198.6	2	18
		198.7	4	19
		198.8	3	19
		198.9	3	21
		199	2	23
		199.1	3	22
		199.2	3	20
		199.3	3	25
		199.4	3	21
		199.5	4	22
		199.6	3	18
		199.7	4	18
[truncated: 7,003 more rows]
