# Supplementary material for: TMEM16 and OSCA/TMEM63 proteins share a conserved potential to permeate ions and phospholipids
Source: eLife. 2024 Nov 4;13:RP96957. doi: 10.7554/eLife.96957 (PMC11534332; doi:10.7554/eLife.96957)
Supplement: Figure 4—figure supplement 2—source data 1. [file elife-96957-fig4-figsupp2-data1.xlsx]

## Sheet: Sheet1
		Fig. 4 SF2c
		WT	K435L	K435L L438K	L438K
		0	0	25.9259	70.5357
		0	0.223214	25	54.7917
		0	0.520833	20.8955	57.2781
		0	3.3341	36.0656	55.5804
			7.08333	35.1031	79.1667
			4.77739	41.3165	63.8889
					62.0915
	Fig. 4 SF2c	Unpaired two-tailed t-test with Welch's correction
		WT	K435L	K435L L438K	L438K
	n	4	6	6	7
	SEM	0	1.18453	3.22643	3.35997
	Mean+SEM	0	3.84101	33.9442	66.6933
	Mean-SEM	0	1.47195	27.4913	59.9733
	P value		0.075	0.0002	<0.0001
	Summary		ns	***	****
	Welch-corrected t		2.243	9.521	7.002
	Welch-corrected df		5	5	10.97
	95% CI		-0.3884 to 5.701	22.42 to 39.01	22.36 to 42.87
	R2		0.5015	0.9477	0.8171
