# Supplementary material for: TMEM16 and OSCA/TMEM63 proteins share a conserved potential to permeate ions and phospholipids
Source: eLife. 2024 Nov 4;13:RP96957. doi: 10.7554/eLife.96957 (PMC11534332; doi:10.7554/eLife.96957)
Supplement: Figure 4—figure supplement 3—source data 1. [file elife-96957-fig4-figsupp3-data1.xlsx]

## Sheet: Sheet1
		Fig. 4 SF3b
		Mock (GFP)	WT
		265.095	2342.09
		92.5401	2482.3
		140.469	1544.49
		60.2588	1799.01
		416.618
	Fig. 4 SF3b	Unpaired two-tailed t-test with Welch's correction
		Mock (GFP)	WT
	n	5	4
	SEM	65.4426	221.825
	Mean+SEM	260.439	2263.8
	Mean-SEM	129.554	1820.15
	P value		0.0022
	Summary		**
	Welch-corrected t		7.986
	Welch-corrected df		3.525
	95% CI		1169 to 2525
	R2		0.9476
