# Supplementary material for: TMEM16 and OSCA/TMEM63 proteins share a conserved potential to permeate ions and phospholipids
Source: eLife. 2024 Nov 4;13:RP96957. doi: 10.7554/eLife.96957 (PMC11534332; doi:10.7554/eLife.96957)
Supplement: Figure 4—source data 1. [file elife-96957-fig4-data1.xlsx]

## Sheet: Sheet1
		Fig. 4c
		WT	L438K	A439K
		0	70.5357	12
		0	54.7917	16.129
		0	57.2781	20
		0	55.5804	6.6667
			79.1667	4.5455
			63.8889	0
			62.0915
	Fig. 4c	Unpaired two-tailed t-test with Welch's correction
		WT	L438K	A439K
	n	4	7	6
	SEM	0	3.35997	3.06787
	Mean+SEM	0	66.6933	12.9581
	Mean-SEM	0	59.9733	6.82233
	P value		<0.0001	0.0234
	Summary		****	*
	Welch-corrected t		18.85	3.224
	Welch-corrected df		6	5
	95% CI		55.11 to 71.55	2.004 to 17.78
	R2		0.9834	0.6752
		Fig. 4e
		Test Potential (mV)	WT 0 mmHg								WT -50 mmHg								L438K 0 mmHg						L438K -50 mmHg								A439K 0 mmHg						A439K -50 mmHg
		-100	0.02518	0.024248	0.030757	0.039025	0.015594	0.013568	0.016166	0.022328	0.030276	0.048173	0.040969	0.034798	0.017047	0.018683	0.024207	0.025106	0.041394	0.031056	0.038235	0.048272	0.033527	0.017314	0.051198	0.05383	0.058824	0.051251	0.039974	0.064815	0.054778	0.047288	0.01573	0.011414	0.008674	0.005733	0.009251	0.01927	0.016907	0.016085	0.01251	0.009009	0.005887	0.01189
		-80	0.028777	0.024248	0.031856	0.039704	0.01537	0.0129	0.017655	0.025161	0.026679	0.04591	0.043523	0.038949	0.015146	0.01379	0.026589	0.033826	0.043573	0.02588	0.030392	0.057211	0.029981	0.015975	0.046841	0.05176	0.05098	0.048868	0.043843	0.06164	0.055253	0.048639	0.016265	0.01152	0.00859	0.010647	0.010934	0.0205	0.016586	0.013272	0.014178	0.013104	0.010093	0.01394
		-60	0.02518	0.020369	0.032996	0.039817	0.013246	0.010899	0.018719	0.026827	0.028177	0.043324	0.041873	0.037666	0.013581	0.01379	0.028461	0.036048	0.03268	0.037267	0.028431	0.05006	0.030625	0.015172	0.04902	0.050725	0.055882	0.048868	0.042876	0.061376	0.053118	0.0525	0.01573	0.010352	0.011259	0.00819	0.003364	0.01927	0.016693	0.014121	0.013344	0.018018	0.010093	0.01394
		-40	0.026079	0.032978	0.034606	0.040195	0.01224	0.00823	0.021612	0.030104	0.02458	0.042354	0.043523	0.038874	0.012575	0.008007	0.029184	0.038491	0.030501	0.037267	0.026471	0.055423	0.028046	0.015529	0.050109	0.039337	0.05098	0.048868	0.046099	0.060053	0.05383	0.048446	0.016479	0.010352	0.011927	0.003276	0.005046	0.02214	0.015944	0.013431	0.009174	0.009009	0.010093	0.02829
		-20	0.026978	0.031038	0.035509	0.041553	0.010843	0.006895	0.023739	0.032548	0.02548	0.039121	0.043051	0.043441	0.011178	0.010676	0.031694	0.042268	0.023965	0.030021	0.026471	0.033969	0.029014	0.01535	0.052288	0.048654	0.055882	0.05006	0.039329	0.063492	0.054778	0.054623	0.01466	0.010511	0.014012	0.004095	0.009251	0.02091	0.016907	0.014599	0.016681	0.018018	0.016821	0.02747
		0	0.020683	0.032008	0.033938	0.043252	0.008551	0.004004	0.025696	0.035214	0.02548	0.039767	0.043758	0.045516	0.009725	0.004448	0.035268	0.043768	0.022876	0.018634	0.026471	0.046484	0.023211	0.012405	0.053377	0.047619	0.042157	0.036949	0.046099	0.065873	0.054541	0.059448	0.014553	0.009237	0.016013	0.005733	0.011775	0.02624	0.02076	0.015926	0.020017	0.027027	0.030278	0.02583
		20	0.022482	0.027158	0.03602	0.044271	0.006204	0.002224	0.028206	0.039158	0.033873	0.043324	0.045094	0.047403	0.010843	0.007117	0.039564	0.048822	0.026144	0.026915	0.019608	0.04112	0.021921	0.01303	0.062092	0.041408	0.054902	0.045292	0.113153	0.071693	0.059758	0.122756	0.013055	0.009927	0.016931	0.013104	0.012616	0.02255	0.048261	0.035462	0.026689	0.03276	0.04878	0.060681
		40	0.024281	0.029098	0.035549	0.043856	0.004807	0.002891	0.030418	0.041713	0.032374	0.049467	0.04969	0.047554	0.00844	0.000445	0.045563	0.049267	0.023965	0.018634	0.015686	0.028605	0.018053	0.010799	0.058824	0.064182	0.111765	0.06913	0.425854	0.080952	0.115011	0.379463	0.011664	0.009768	0.019099	0.007371	0.01598	0.02419	0.280578	0.15666	0.216013	0.235053	0.34651	0.508815
		60	0.030576	0.028128	0.036649	0.048309	0.002683	-0.00089	0.033694	0.044823	0.126199	0.075655	0.06713	0.145003	0.007601	0.006673	0.052412	0.061875	0.026144	0.02588	0.023529	0.051847	0.019987	0.012227	0.448802	0.380952	0.457843	0.415971	0.64539	0.396032	0.417595	0.5746	0.01038	0.010458	0.020434	0.013923	0.013457	0.02624	0.409845	0.348941	0.531276	0.619984	0.679563	0.715457
		80	0.021583	0.021339	0.038181	0.048611	0.003186	-0.00311	0.034885	0.046767	0.403177	0.464274	0.396103	0.381793	0.014532	0.025356	0.060027	0.066263	0.015251	0.019669	0.014706	0.021454	0.018375	0.011066	0.618736	0.564182	0.670588	0.579261	0.846873	0.627778	0.553948	0.778228	0.009952	0.009396	0.021518	0.01638	0.023549	0.03198	0.539433	0.481128	0.806505	0.884521	0.897393	0.923329
		100	0.029676	0.029098	0.03932	0.048234	0.001341	-0.004	0.03982	0.050933	0.511091	0.574846	0.625069	0.673498	0.057121	0.478203	0.308857	0.205177	0.03268	0.030021	0.019608	0.044696	0.018053	0.01062	0.760349	0.756729	0.807843	0.724672	0.931979	0.754762	0.763576	0.85331	0.009417	0.008441	0.024187	0.017199	0.012616	0.03403	0.650829	0.605882	0.941618	0.961507	0.994954	0.99344
		120	0.028777	0.029098	0.041323	0.055556	0.00408	-0.00801	0.04033	0.054599	0.617806	0.750727	0.776927	0.678593	0.462609	0.641014	0.594614	0.530327	0.137691	0.245342	0.236275	0.233969	0.265635	0.113208	0.851852	0.873706	0.926471	0.808105	0.981302	0.850265	0.870998	0.936306	0.263135	0.028402	0.029441	0.428174	0.577881	0.053301	0.775816	0.746881	0.985822	1.00409	1.01262	1.00779
		140	0.172662	0.132881	0.046233	0.053744	0.012072	0.006228	0.052582	0.060931	0.760192	0.879082	0.879252	0.853563	0.734965	0.802936	0.795967	0.703288	0.312636	0.273292	0.211765	0.327175	0.3098	0.19177	0.970588	0.934783	0.988235	0.917759	0.994197	0.985185	0.944747	0.947694	0.245265	0.235866	0.63211	0.660934	0.676198	0.278803	0.888496	0.903966	0.996664	1.00246	1.01093	1.01066
		160	0.233813	0.199806	0.107982	0.143418	0.225911	0.141459	0.127925	0.070318	1	1	1	1	1	1	1	1	0.37691	0.303313	0.277451	0.40584	0.37247	0.285141	1	1	1	1	1	1	1	1	0.297378	0.265754	0.758799	0.643735	0.696383	0.353424	1	1	1	1	1	1
		Fig. 4f (-50 mmHg)
		WT	L438K	A439K
		111.1	70.72	78.82
		92.89	74.35	89.49
		90.92	67.16	58.66
		92.23	73.54	54.36
		125.9	48.37	50.11
		107	72.74	44.02
		117.9	74.11
		132	52.57
	Fig. 4f (-50 mmHg)	Unpaired two-tailed t-test with Welch's correction
		WT	L438K	A439K
	n	8	8	6
	SEM	5.62099	3.65649	7.23601
	Mean+SEM	114.363	70.3515	69.8127
	Mean-SEM	103.122	63.0385	55.3407
	P value		<0.0001	0.0005
	Summary		****	***
	Welch-corrected t		6.27	5.038
	Welch-corrected df		12.02	10.2
	95% CI		-56.65 to -27.44	-66.53 to -25.80
	R2		0.7658	0.7133
		Fig. 4g (-50 mmHg +160 mV)
		WT	L438K	A439K
		53.5408	21.9684	26.8657
		55.5577	16.7231	26.2169
		33.1848	4.11175	13.5066
		31.3297	14.1216	7.69001
		43.4766	13.5054	5.63523
		53.0934	6.65264	16.2152
		28.2259	13.1506	17.951
		33.272
	Fig. 4g (-50 mmHg +160 mV)	Unpaired two-tailed t-test with Welch's correction
		WT	L438K	A439K
	n	8	7	7
	SEM	4.00308	2.26272	3.11824
	Mean+SEM	45.4632	15.1532	19.4155
	Mean-SEM	37.457	10.6278	13.179
	P value		<0.0001	0.0005
	Summary		****	***
	Welch-corrected t		6.213	5.038
	Welch-corrected df		10.89	10.2
	95% CI		-38.70 to -18.44	-66.53 to -25.80
	R2		0.78	0.7133
