# Supplementary material for: TMEM16 and OSCA/TMEM63 proteins share a conserved potential to permeate ions and phospholipids
Source: eLife. 2024 Nov 4;13:RP96957. doi: 10.7554/eLife.96957 (PMC11534332; doi:10.7554/eLife.96957)
Supplement: Figure 5—source data 1. [file elife-96957-fig5-data1.xlsx]

## Sheet: Sheet1
		Fig. 5c
		Time (s)	WT					A439K
		0	0.014999	0.027333	0.021382	0.001059	0.002679	0.011219	0	0.232323	0.260582	0.189147
		5	0	0.011052	0.006788	0	0.002709	0	0.138857	0.209091	0.208995	0.17763
		10	0.000825	0.016743	0.007066	0.02077	0.022462	0.03473	0.015048	0.231987	0.284392	0.190476
		15	0.005709	0.039926	0.021369	0.006917	0.008847	0.113498	0.194667	0.201347	0.224868	0.12979
		20	0.028529	0.048854	0.016897	0.005687	0.009197	0.098818	0.21581	0.26229	0.30291	0.154374
		25	0.016137	0.037064	0.016222	0.011343	0.018164	0.153479	0.180381	0.2633	0.161376	0.198007
		30	0.021269	0.051011	0.019398	0.012119	0.019443	0.208736	0.190857	0.230303	0.248677	0.16412
		35	0.007755	0.025087	0.014118	0.013319	0.010436	0.171142	0.316	0.208081	0.338624	0.158361
		40	0.005049	0.042359	0.002951	0.014096	0.015315	0.226757	0.388381	0.214478	0.263228	0.187375
		45	0.00269	0.036822	0.006629	0.008308	0.009687	0.276047	0.436952	0.249158	0.239418	0.195349
		50	0.011583	0.02686	0.005809	0.044949	0.001929	2.01349	4.64819	0.025589	0.010582	0
		55	0.016385	0.020409	0.011922	0.017655	0.003369	2.06922	4.60076	0	0.033069	0.113462
		60	0.010989	0.027685	0.010175	0.109165	0.005878	2.04046	4.39809	0.042761	0.007937	0.940385
		65	0.013431	0.040675	0.022084	0.160073	0	2.1863	4.48248	0.036027	0.022487	1.90256
		70	0.0099	0.046068	0.004075	0.161887	0.007837	2.25814	5.532	0.03367	0.02381	2.89295
		75	0.003465	0.046927	0	0.197076	0.002949	2.49636	5.73695	0.066667	0.046296	3.68461
		80	0.008168	0.024977	0.012464	0.208893	0.014805	2.39217	5.76705	0.062626	0.051587	3.63269
		85	0.007359	0.04215	0.001972	0.350171	0.010626	2.3535	5.59105	0.075758	0	3.49231
		90	0.012095	0.015719	0.020364	0.373876	0.006028	2.4016	5.81391	0.073401	0.034392	3.77308
		95	0.013365	0.039673	0.018643	0.224763	0.011146	2.67072	5.81676	0.096633	0.043651	4.30961
		100	0.019866	0.034873	0.011022	0.433928	0.019443	2.6854	5.94705	0.134007	0.148148	4.02115
		105	0.019173	0.04281	0.019689	0.425469	0.024591	2.74913	5.96209	0.140067	0.082011	4.0218
		110	0.012705	0.055767	0.010334	0.37194	0.018564	2.81442	6.22762	0.157239	0.117725	3.66731
		115	0.018827	0.048039	0.03296	0.510375	0.025451	3.16267	6.13314	0.192593	0.113757	3.89039
		120	0.032571	0.047323	0.022415	0.323503	0.024571	3.01754	6.88495	0.150842	0.117725	4.53013
		125	0.027027	0.050174	0.025061	0.18045	0.001519	3.10872	6.80095	0.167003	0.119048	4.86987
		130	0.013299	0.044483	0.013536	0.154477	0.019663	3.17723	6.94629	0.144444	0.179894	4.28654
		135	0.020592	0.038715	0.021025	0.152732	0.002409	3.44039	7.17524	0.215488	0.084656	4.40192
		140	0.023034	0.047136	0.03476	0.354033	0.031309	3.49911	7.68362	0.23367	0.210317	5.00513
		145	0.017771	0.052585	0.014912	0.450373	0.009797	3.47786	7.67162	0.202357	0.166667	5.58333
		150	0.018909	0.044703	0.034667	0.450625	0.018114	3.39038	8.13905	0.222559	0.205026	6.57756
		155	0.0231	0.038374	0.018207	0.254154	0.039246	3.53109	8.26076	0.200673	0.174603	5.5141
		160	0.019982	0.055392	0.018657	0.113723	0.018334	3.61141	8.21219	0.310774	0.224868	5.70385
		165	0.02706	0.052993	0.029718	0.107209	0.034188	3.65915	7.68076	0.285185	0.14418	5.94487
		170	0.021995	0.064122	0.023301	0.006332	0.010826	4.01528	8.12152	0.269697	0.22619	6.25577
		175	0.039303	0.055194	0.031809	0.009437	0.014045	4.01337	8.33695	0.292256	0.310847	7.00385
		180	0.020097	0.037372	0.02035	0.016445	0.015994	3.98258	8.27276	0.327946	0.210317	6.68846
		185	0.013349	0.04314	0.014833	0.026124	0.024222	3.99451	8.66457	0.326936	0.309524	7.16026
		190	0.021351	0.035853	0.020866	0.0256	0.025411	3.96658	8.524	0.387205	0.34127	6.67372
		195	0.017292	0.038935	0.019556	0.014206	0.014575	4.08247	8.8581	0.371044	0.382275	6.73205
		200	0.014256	0.043052	0.016593	0.018683	0.018454	4.07364	8.87124	0.394276	0.480159	6.8641
		205	0.018992	0.043515	0.026133	0.027778	0.030149	4.30099	9.296	0.4633	0.384921	7.29103
		210	0.039188	0.043217	0.030393	0.034745	0.034648	4.50352	9.38819	0.416162	0.509259	7.56795
		215	0.039188	0.055359	0.042633	0.02314	0.023152	4.53873	9.69638	0.505051	0.456349	7.68077
		220	0.027885	0.03374	0.020575	0.035955	0.037787	4.65998	10.0438	0.547475	0.665344	7.97372
		225	0.018612	0.032991	0.02469	0.03901	0.037637	4.59661	10.3251	0.589899	0.689153	8.25833
		230	0.026549	0.035314	0.00864	0.03171	0.030359	4.57167	10.1013	0.646465	0.677249	7.9359
		235	0.014372	0.042183	0.026318	0.025459	0.021662	4.70032	10.2655	0.686195	0.858466	8.35961
		240	0.038462	0.040267	0.037009	0.029099	0.02724	4.78279	9.89162	0.718182	0.883598	8.44936
		245	0.035228	0.041181	0.033569	0.033555	0.0277	4.84461	10.396	0.728283	0.742063	8.29872
		250	0.033066	0.02872	0.033635	0.041964	0.042995	4.86717	10.364	0.758586	0.958995	8.65897
		255	0.031449	0.022423	0.035196	0.032204	0.035688	5.058	10.6381	0.855219	1.05556	9.45064
		260	0.056991	0.036525	0.055944	0.042982	0.045654	5.12937	10.7912	0.906734	1.26852	8.7532
		265	0.050408	0.039387	0.047092	0.041057	0.039546	5.39229	10.6503	0.937037	1.36243	8.99038
		270	0.047916	0.032187	0.044339	0.032991	0.02871	5.26877	11.0086	1.08451	1.53042	8.83974
		275	0.040838	0.03003	0.032325	0.046895	0.043585	5.50316	11.2623	1.09764	1.46561	9.0032
		280	0.038907	0.031912	0.043995	0.033434	0.02785	5.77038	11.3928	1.22761	1.57407	9.09167
		285	0.038676	0.011613	0.030605	0.044515	0.042055	5.71106	11.3973	1.21852	1.88757	9.51859
		290	0.04196	0.031263	0.035924	0.047429	0.045084	5.80857	11.4499	1.28283	1.97884	9.26603
		295	0.045227	0.030338	0.031478	0.051926	0.055491	6.10956	11.3488	1.37172	2.08995	10.0019
		300	0.048857	0.023304	0.046523	0.048679	0.044344	6.06313	12.024	1.3771	2.33466	10.5231
		305	0.052058	0.038704	0.051326	0.041208	0.036317	6.35028	11.9509	1.48586	2.40212	10.2006
		310	0.057701	0.019374	0.047634	0.052591	0.050712	6.2184	11.9455	1.51953	2.94973	10.6718
		315	0.060308	0.043316	0.043215	0.043184	0.041475	6.24168	12.4088	1.6367	2.72222	10.5961
		320	0.0512	0.033046	0.048203	0.033333	0.037987	6.36317	12.3015	1.63165	2.95635	9.58397
		325	0.052668	0.021135	0.048865	0.036469	0.036497	6.4787	12.7895	1.74781	2.80159	11.2327
		330	0.059301	0.021477	0.046324	0.036187	0.042895	6.30517	12.9773	1.99192	2.72884	10.416
		335	0.059252	0.018824	0.053827	0.048931	0.049833	6.62836	12.7099	1.99865	3.12037	10.0199
		340	0.062106	0.02555	0.057915	0.050292	0.048103	6.56892	12.7632	2.09226	3.32275	10.5506
		345	0.042785	0.006286	0.037102	0.036308	0.034808	6.69794	12.7575	2.15017	3.83862	10.2692
		350	0.058592	0.029413	0.056738	0.03045	0.030839	6.75092	12.7274	2.1936	3.70238	10.4782
		355	0.05676	0.03473	0.069453	0.05849	0.054841	6.8754	12.9164	2.32828	3.93519	10.5904
		360	0.062981	0.035974	0.057399	0.046713	0.049753	6.83709	12.7036	2.38889	3.69841	11.0404
		365	0.074036	0.043405	0.063155	0.055939	0.05713	7.08163	12.9533	2.60875	3.86111	11.125
		370	0.061166	0.056823	0.047542	0.048911	0.049423	7.13808	13.2324	2.69226	4.06349	10.5397
		375	0.044715	0.052178	0.037512	0.06219	0.055351	7.48454	13.7371	2.65354	4.0873	11.216
		380	0.061067	0.029744	0.0477	0.058782	0.055091	7.38179	13.5288	2.60067	3.99603	11.0846
		385	0.071313	0.030966	0.061475	0.050786	0.043355	7.46712	13.5552	2.76566	4.07143	10.6603
		390	0.067881	0.026309	0.061395	0.041702	0.041246	7.4664	13.9743	3.01616	4.26323	10.3494
		395	0.054632	0.016259	0.054237	0.054325	0.048883	7.59971	14.3211	3.11145	4.55026	10.7083
		400	0.063674	0.015807	0.062189	0.047953	0.047084	7.65975	14.0116	3.2963	4.42328	11.2994
		405	0.05384	0.022875	0.05605	0.05611	0.053281	7.73959	14.0827	3.25556	4.93915	10.75
		410	0.063608	0.009148	0.056658	0.049264	0.047813	7.8618	13.9689	3.41987	4.46429	10.7519
		415	0.056513	0.013727	0.050558	0.051039	0.051102	7.84604	14.3678	3.5165	5.02116	10.2628
		420	0.067848	0.028324	0.062877	0.038788	0.039146	7.91264	14.0301	3.57306	4.7672	10.7115
		425	0.076115	0.014729	0.06555	0.044223	0.041475	7.91252	14.4905	3.60404	4.89815	10.8154
		430	0.077484	0.004084	0.071531	0.037104	0.035777	8.12782	14.5855	3.68923	4.95106	11.4417
		435	0.08514	0.034796	0.082129	0.048094	0.048243	8.55007	14.7341	3.88687	5.62831	10.8231
		440	0.081708	0.024515	0.072721	0.058288	0.055221	8.82766	14.5128	3.83737	5.54762	11.1763
		445	0.078887	0.015973	0.066741	0.053237	0.051712	8.59983	14.6067	3.97273	5.47751	11.1635
		450	0.08453	0.015323	0.067879	0.04513	0.044584	8.67418	14.9743	4.0899	5.59921	11.0699
		455	0.086262	0.021994	0.074799	0.031256	0.030789	8.91312	15.1545	4.2936	5.4127	11.025
		460	0.086444	0.015378	0.073846	0.047076	0.046754	9.30433	15.3754	4.3468	5.53836	10.7442
		465	0.085025	0.024735	0.070207	0.050938	0.048943	9.35792	15.7613	4.48721	6.08333	10.9942
		470	0.091229	0.027751	0.08643	0.051674	0.054071	9.35458	15.3006	4.67643	6.23677	12.0006
		475	0.090107	0.019143	0.080912	0.055626	0.046304	9.79651	15.7836	4.6771	6.62434	11.2827
		480	0.080306	0	0.068858	0.045685	0.047443	9.72646	15.897	4.59495	6.54497	11.475
		485	0.067238	0.008025	0.059477	0.060557	0.058599	9.78386	15.628	4.87946	6.35582	10.9006
		490	0.074531	0.029468	0.070962	0.058409	0.055701	9.85977	16.0709	4.99899	6.67328	11.6103
		495	0.083342	0.019319	0.079867	0.051533	0.052842	10.0578	16.512	4.98182	6.64682	10.1763
		500	0.087071	0.017316	0.074124	0.06096	0.067556	10.2689	16.0128	5.18485	6.43254	10.6333
		505	0.083045	0.02042	0.079232	0.03906	0.036407	10.2571	16.3691	5.44343	6.49339	10.4808
		510	0.068838	0.03986	0.063076	0.036025	0.032189	10.3681	16.4097	5.37946	7.11243	10.8654
		515	0.092004	0.022831	0.074799	0.05119	0.051242	10.307	16.4354	5.40707	6.65344	10.8461
		520	0.095172	0.050648	0.076453	0.039595	0.034658	10.5182	16.6888	5.70842	7.2381	10.184
		525	0.104693	0.052387	0.077564	0.037497	0.035178	10.7031	16.5533	5.78182	7.5754	10.366
		530	0.093753	0.056042	0.089314	0.044858	0.043215	10.8224	17.1752	5.6963	7.07143	10.5199
		535	0.107745	0.048997	0.093059	0.042075	0.043955	10.9562	17.4053	6.01246	7.18254	10.4391
		540	0.101261	0.03986	0.086893	0.045775	0.046754	10.8339	17.6604	5.90303	7.63624	10.3058
		545	0.096641	0.03768	0.075791	0.047459	0.052382	11.2615	17.9526	5.97205	7.71825	10.6929
		550	0.102069	0.044406	0.070049	0.025388	0.027061	11.1838	18.1587	6.033	8.00397	10.9538
		555	0.096575	0.036635	0.079179	0.051704	0.055251	11.4117	18.3244	6.15219	8.21296	11.268
		560	0.104165	0.028753	0.073211	0.050555	0.049263	11.1623	18.7185	6.28552	8.46693	10.9417
		565	0.116474	0.036888	0.086231	0.050887	0.054181	11.6924	18.5598	6.41111	9.71693	10.8442
		570	0.108801	0.037031	0.072589	0.037235	0.035737	11.6983	18.7629	6.75286	10.504	10.8372
		575	0.112316	0.045529	0.087554	0.045473	0.048303	12.0504	18.892	7.03131	10.455	10.8333
		580	0.104924	0.018956	0.081666	0.044666	0.042005	11.8828	19.0524	6.61145	9.28704	11.4417
		585	0.119361	0.035974	0.094858	0.056261	0.053291	11.85	19.5392	7.01751	9	11.157
		590	0.109709	0.03331	0.08381	0.057028	0.050152	12.3382	19.7752	6.90875	8.87566	10.4545
		595	0.118322	0.025307	0.098775	0.04636	0.044944	12.3282	20.0956	7.0202	9.84392	11.1558
		600	0.137181	0.040003	0.10895	0.031952	0.035028	12.1639	19.992	7.15724	9.74735	10.7622
		605	0.132974	0.025175	0.104782	0.050181	0.047473	12.32	20.2048	7.14478	9.33466	10.9013
		610	0.147444	0.032804	0.10977	0.043547	0.041435	12.3744	20.2634	7.42155	9.71429	11.7628
		615	0.143138	0.013738	0.106925	0.049496	0.049053	12.4968	19.879	7.5367	9.82143	12.5596
		620	0.120896	0.03342	0.099807	0.052672	0.049993	12.9043	20.1417	7.68384	10.8267	11.6256
		625	0.125928	0.047235	0.081865	0.051754	0.049093	13.0461	20.7463	7.67071	10.9378	10.6526
		630	0.130383	0.02403	0.095599	0.046663	0.042875	13.1867	21.3164	7.76734	10.3571	10.4519
		635	0.13667	0.023623	0.102678	0.057249	0.059779	13.5022	21.0053	7.93199	9.96296	11.2615
		640	0.153401	0.035325	0.106237	0.057199	0.060369	13.7013	21.232	8.09596	10.5529	11.4327
		645	0.141488	0.041852	0.099794	0.061414	0.061099	13.3387	20.9583	8.34175	10.6891	11.1955
		650	0.15477	0.036536	0.116016	0.059266	0.060259	13.5495	21.2484	8.2963	10.922	11.309
		655	0.155529	0.033475	0.106978	0.062815	0.068746	13.705	21.773	8.38788	10.8796	11.341
		660	0.139458	0.035171	0.099079	0.062271	0.060129	13.6784	22.0975	8.27407	11.2315	11.0814
		665	0.14129	0.040895	0.086893	0.06214	0.065427	13.9735	21.7141	8.63064	11.4087	11.0776
		670	0.16269	0.036987	0.113727	0.063249	0.065717	14.3716	21.6882	8.65926	11.6653	10.9244
		675	0.163334	0.039321	0.107997	0.050373	0.051732	14.5119	22.1446	8.66667	12.7923	11.3667
		680	0.156734	0.037768	0.09413	0.061202	0.061568	14.4454	22.3964	9.14815	12.0463	11.0769
		685	0.14256	0.042139	0.090333	0.044787	0.045164	14.6848	22.1872	9.24209	12.5952	11.6821
		690	0.148319	0.036899	0.09806	0.053559	0.050212	14.6384	22.6941	9.41549	12.2698	12.1288
		695	0.152279	0.025638	0.098934	0.06827	0.069106	14.8606	22.3573	9.47744	13.295	12.2045
		Fig. 5c (t=695)
		WT	A439K
		0.152279	14.8606
		0.025638	22.3573
		0.098934	9.47744
		0.06827	13.295
		0.069106	12.2045
	Fig. 5c (t=695)	Unpaired two-tailed t-test with Welch's correction
		WT	A439K
	n	5	5
	SEM	0.020921	2.1656
	Mean+SEM	0.103766	16.6046
	Mean-SEM	0.0619244	12.2734
	P value		0.0027
	Summary		**
	Welch-corrected t		6.629
	Welch-corrected df		4.001
	95% CI		8.344 to 20.37
	R2		0.9166
