# Supplementary material for: TMEM16 and OSCA/TMEM63 proteins share a conserved potential to permeate ions and phospholipids
Source: eLife. 2024 Nov 4;13:RP96957. doi: 10.7554/eLife.96957 (PMC11534332; doi:10.7554/eLife.96957)
Supplement: Figure 6—figure supplement 1—source data 1. [file elife-96957-fig6-figsupp1-data1.xlsx]

## Sheet: Sheet1
		Fig. 6 FS1c
		Time (s)	WT			A476K
		0	0	0	0	0	0	0	0	0
		7	0.005	0.015	-0.007	-0.013	-0.028	-0.003	-0.005	-0.011
		14	0.002	0.025	-0.008	-0.004	-0.016	0	0.015	0
		21	-0.006	0.013	-0.005	-0.013	-0.035	0.009	0.021	0.01
		28	-0.001	0.006	-0.016	-0.013	-0.013	0.004	0.031	-0.002
		35	-0.002	0.006	-0.011	-0.005	-0.029	0.017	0.032	-0.006
		42	0.002	0.02	-0.006	-0.016	-0.032	0.007	0.038	-0.004
		49	-0.008	0.017	-0.022	-0.011	-0.029	0.009	0.036	0.014
		56	-0.004	0.008	-0.012	-0.006	-0.027	0.027	0.031	-0.001
		63	-0.01	0.003	-0.037	-0.007	-0.014	0.03	0.044	0.003
		70	-0.015	0.006	-0.019	0.008	-0.009	0.04	0.032	0.006
		77	-0.021	0.011	-0.012	0.007	0.005	0.043	0.045	0.009
		84	-0.007	0.014	-0.009	0.002	-0.014	0.038	0.022	0.007
		91	0.01	0.026	-0.014	-0.015	-0.019	0.044	0.051	0.013
		98	-0.006	0.015	-0.005	0.005	-0.009	0.049	0.052	0.026
		105	-0.001	0.017	-0.011	0.013	0.002	0.082	0.055	0.018
		112	-0.001	0.018	-0.009	0.008	-0.005	0.054	0.063	0.032
		119	-0.004	0.017	-0.013	0.011	0.004	0.065	0.05	0.019
		126	0.006	0.019	0.005	0.007	0.007	0.078	0.053	0.02
		133	0.017	0.035	0.004	0.008	0.002	0.071	0.035	0.014
		140	0.024	0.033	0.004	0.016	-0.001	0.065	0.046	0.028
		147	0.002	0.035	0.014	0.011	-0.004	0.076	0.042	0.017
		154	0.01	0.027	0.007	0.014	-0.005	0.073	0.036	0.004
		161	0.025	0.043	0.018	0.011	-0.002	0.08	0.055	0.025
		168	0.01	0.043	0.012	0.003	-0.005	0.067	0.034	0.01
		175	0.025	0.045	0.009	-0.003	-0.011	0.09	0.061	0.03
		182	0.016	0.031	0.01	0.004	0.001	0.087	0.05	0.036
		189	0.016	0.038	0.006	-0.001	0.007	0.077	0.046	0.027
		196	0.011	0.037	0.004	0.007	0.002	0.092	0.06	0.035
		203	0.012	0.044	0.006	0.009	0.009	0.1	0.042	0.029
		210	0.027	0.043	0.007	0.004	0.006	0.096	0.046	0.027
		217	0.016	0.039	0.003	0.001	0.018	0.122	0.05	0.047
		224	0.012	0.033	0.003	0.004	0.019	0.103	0.04	0.037
		231	0.024	0.03	-0.006	0.005	0.025	0.124	0.037	0.032
		238	0.001	0.033	-0.001	0.007	0.021	0.103	0.028	0.037
		245	0.015	0.033	0.014	0.015	0.027	0.108	0.031	0.03
		252	0.018	0.035	-0.001	0	0.031	0.096	0.039	0.047
		259	0.007	0.023	-0.015	0.018	0.05	0.094	0.025	0.031
		266	0.002	0.021	-0.01	0.038	0.068	0.105	0.025	0.033
		273	-0.008	0.013	-0.008	0.025	0.058	0.124	0.04	0.041
		280	-0.008	0.032	-0.014	0.03	0.062	0.132	0.044	0.046
		287	-0.012	0.02	-0.008	0.032	0.061	0.122	0.038	0.033
		294	0.021	0.042	-0.006	0.011	0.037	0.122	0.042	0.04
		301	0.011	0.026	-0.004	0.02	0.053	0.137	0.039	0.034
		308	0.007	0.027	0.001	0.022	0.055	0.112	0.043	0.037
		315	0.003	0.038	-0.015	0.02	0.055	0.113	0.044	0.049
		322	0.006	0.034	-0.021	0.018	0.052	0.144	0.042	0.038
		329	-0.008	0.02	-0.018	0.018	0.057	0.124	0.045	0.049
		336	-0.002	0.03	-0.009	0.01	0.048	0.112	0.047	0.039
		343	0.003	0.04	-0.005	0.01	0.053	0.131	0.035	0.035
		350	0.006	0.03	-0.009	0.013	0.047	0.139	0.049	0.038
		357	0.016	0.038	-0.004	0.015	0.051	0.117	0.06	0.025
		364	0.008	0.042	-0.006	0.01	0.054	0.121	0.036	0.038
		371	0.002	0.037	-0.014	0.011	0.057	0.133	0.03	0.036
		378	-0.001	0.041	-0.001	0.016	0.069	0.145	0.027	0.021
		385	0.022	0.051	0.003	0.005	0.054	0.136	0.02	0.028
		392	0.014	0.036	-0.007	0.023	0.069	0.152	0.04	0.049
		399	0.014	0.035	0.007	0.008	0.053	0.165	0.039	0.05
		406	0.012	0.047	0.001	0.018	0.06	0.166	0.04	0.05
		413	0.021	0.054	0.001	0.02	0.069	0.133	0.034	0.049
		420	0.021	0.044	-0.015	0.025	0.061	0.157	0.044	0.059
		427	0.013	0.037	-0.01	0.016	0.066	0.138	0.043	0.059
		434	0.011	0.028	-0.004	0.008	0.066	0.156	0.035	0.059
		441	0.008	0.046	-0.008	0.018	0.073	0.178	0.052	0.061
		448	0.011	0.038	-0.001	0.015	0.069	0.177	0.043	0.061
		455	0.023	0.055	0.008	0.009	0.063	0.179	0.054	0.071
		462	0.014	0.048	0.003	0.015	0.071	0.165	0.062	0.063
		469	0.02	0.052	0	0.03	0.083	0.169	0.074	0.076
		476	0.017	0.056	0.001	0.025	0.061	0.196	0.093	0.076
		483	0.02	0.059	0.005	0.011	0.062	0.175	0.066	0.058
		490	0.022	0.059	0.003	0.021	0.073	0.185	0.081	0.077
		497	0.039	0.05	0	0.02	0.077	0.174	0.068	0.065
		504	0.024	0.048	0.004	0.011	0.064	0.165	0.066	0.048
		511	0.03	0.057	0.006	0.013	0.065	0.156	0.066	0.058
		518	0.014	0.055	0.004	0.028	0.082	0.174	0.05	0.051
		525	0.025	0.06	0.011	0.034	0.092	0.166	0.072	0.058
		532	0.038	0.058	0.009	0.028	0.081	0.16	0.059	0.061
		539	0.022	0.041	0.003	0.023	0.069	0.175	0.052	0.056
		546	0.019	0.042	0.019	0.016	0.069	0.176	0.057	0.064
		553	0.029	0.049	0.006	0.016	0.072	0.19	0.067	0.064
		560	0.022	0.053	0.011	0.023	0.078	0.178	0.071	0.056
		567	0.028	0.059	0.018	0.03	0.091	0.209	0.066	0.057
		574	0.024	0.06	-0.005	0.037	0.09	0.201	0.08	0.061
		581	0.013	0.039	-0.005	0.038	0.096	0.163	0.075	0.069
		588	0.017	0.059	0	0.028	0.082	0.192	0.066	0.059
		595	0.02	0.041	-0.004	0.03	0.083	0.178	0.051	0.057
		602	0.012	0.049	0	0.029	0.083	0.172	0.051	0.051
		609	0.007	0.052	-0.003	0.025	0.096	0.191	0.085	0.066
		616	0.013	0.038	-0.003	0.017	0.092	0.196	0.057	0.066
		623	0.029	0.053	-0.006	0.017	0.09	0.194	0.058	0.067
		630	0.021	0.05	0.013	0.026	0.092	0.208	0.072	0.072
		637	0.032	0.068	0.012	0.029	0.097	0.198	0.066	0.066
		644	0.018	0.06	0.002	0.031	0.094	0.202	0.064	0.067
		651	0.018	0.053	-0.004	0.039	0.105	0.211	0.061	0.073
		658	0.019	0.054	0.007	0.03	0.099	0.197	0.043	0.059
		665	0.028	0.047	0.007	0.045	0.105	0.196	0.04	0.066
		672	0.016	0.051	-0.002	0.039	0.106	0.196	0.027	0.049
		679	0.014	0.051	0.002	0.028	0.11	0.206	0.054	0.078
		686	0.018	0.041	-0.009	0.045	0.103	0.216	0.058	0.081
		693	0.034	0.07	0.003	0.036	0.102	0.22	0.057	0.076
		Fig. 6 FS1c (t=693)
		WT	A476K
		0.034	0.036
		0.07	0.102
		0.003	0.22
			0.057
			0.076
	Fig. 6 FS1c (t=693)	Unpaired two-tailed t-test with Welch's correction
		WT	A476K
	n	3	5
	SEM	0.0193592	0.0323333
	Mean+SEM	0.0550258	0.130533
	Mean-SEM	0.0163075	0.0658667
	P value		0.1492
	Summary		ns
	Welch-corrected t		1.659
	Welch-corrected df		5.873
	95% CI		-0.03017 to 0.1552
	R2		0.3192
