# Supplementary material for: TMEM16 and OSCA/TMEM63 proteins share a conserved potential to permeate ions and phospholipids
Source: eLife. 2024 Nov 4;13:RP96957. doi: 10.7554/eLife.96957 (PMC11534332; doi:10.7554/eLife.96957)
Supplement: Figure 6—source data 1. [file elife-96957-fig6-data1.xlsx]

## Sheet: Sheet1
		Fig. 6c
		WT	W472K	S475K	A476K
		0	69.3878	58.8235	0
		0	75.7576	59.5238	0
		0	68.421	62.7907	0
		0	45.1923	56.25	0
	Fig. 6c	Unpaired two-tailed t-test with Welch's correction
		WT	W472K	S475K	A476K
	n	4	4	4	4
	SEM	0	6.69976	1.34647	0
	Mean+SEM	0	71.3894	60.6935	0
	Mean-SEM	0	57.9899	58.0005	0
	P value		0.0024	<0.0001
	Summary		**	****
	Welch-corrected t		9.656	44.08
	Welch-corrected df		3	3
	95% CI		43.37 to 86.01	55.06 to 63.63
	R2		0.9688	0.9985
		Fig. 6e
		Test Potential (mV)	WT							W472K							S475K					A476K							Mock (normalized to WT)
		-100	-0.06175	-0.07859	-0.04696	-0.01696	-0.02376	-0.01724	-0.03007	0.000636	0.004658	-0.01128	0.005314	-0.06689	-0.11277	-0.00653	-0.02913	-0.05332	-0.1562	-0.12476	-0.0766	-0.06131	-0.03034	-0.01814	-0.11172	-0.15584	-0.16189	-0.10725	-0.01459	0.00404	0.00615	0.00122	0.00316	0.002453	0.006755
		-80	-0.0196	-0.06247	-0.03932	-0.04244	-0.02981	-0.00965	-0.02636	-0.01347	-0.01839	-0.01115	-0.03169	-0.07548	-0.09775	-0.10869	-0.04641	-0.0471	-0.16461	-0.09646	-0.06643	-0.03581	-0.00735	-0.00946	-0.11862	-0.13503	-0.11907	-0.09663	0.001842	0.001604	0.003812	-0.00041	0.000211	0.001349	0.00393
		-60	-0.01571	-0.05415	-0.0438	-0.0228	-0.02629	-0.00013	-0.01128	-0.01538	-0.05466	-0.04187	-0.03358	-0.03757	-0.07643	0.020328	-0.00344	0.006427	-0.14088	-0.09505	-0.05308	-0.01369	-0.00816	-0.00932	-0.10364	-0.11087	-0.09815	-0.06932	-6.9e-05	0.000535	0.002563	-0.00037	0.000281	0.001034	0.001105
		-40	-0.0175	-0.04299	-0.03715	-0.00648	-0.01144	0.005013	-0.00042	0.019288	-0.01941	0.041404	-0.02958	0.004228	-0.06255	0.07925	0.012422	0.027206	-0.06278	-0.08	-0.03975	0.03088	0.001478	0.016645	-0.08756	-0.07651	-0.07775	-0.05896	0.000591	-0.0016	0.002178	-0.0005	-0.00023	0.000648	-0.00027
		-20	-0.01314	-0.02604	-0.02205	0.003298	-0.00913	0.01957	0.012385	0.016545	0.000487	0.128706	-0.00194	0.050779	-0.03131	0.147159	0.029216	0.052018	-0.0089	-0.02476	-0.02229	0.072864	0.036621	0.040904	-0.06333	-0.05028	-0.06124	-0.0227	-0.00146	-0.0014	0.001025	-0.00205	0.001708	0.000526	-0.00088
		0	-0.00319	-0.00545	-0.0062	0.028465	-0.00396	0.036503	0.028471	0.031296	0.043223	0.225762	0.033629	0.10879	-0.00632	0.196656	0.056072	0.090161	0.048937	0.053509	9.95e-05	0.130921	0.114242	0.075867	-0.01625	-0.00271	-0.01472	0.003337	-0.00097	-0.00048	-0.00026	0.000271	0.002762	0.000999	-0.00147
		20	0.016098	0.027829	0.009889	0.04422	0.00341	0.052149	0.047596	0.03855	0.021355	0.242622	0.089646	0.144597	0.034483	0.234896	0.101537	0.131511	0.12259	0.144829	0.034007	0.184608	0.14365	0.118444	0.050639	0.063179	0.036217	0.02245	0.001564	-0.00172	-0.0016	-0.00149	0.001381	-0.00011	-0.00158
		40	0.057236	0.076372	0.040913	0.05664	0.02607	0.080858	0.079077	0.05561	0.035871	0.316166	0.142147	0.207569	0.08866	0.238271	0.13696	0.174326	0.224419	0.2062	0.082272	0.241742	0.20059	0.138247	0.134811	0.13947	0.093308	0.05112	0.002814	-8.9e-05	-0.00192	-0.00023	0.001334	7.01e-05	0.001965
		60	0.096819	0.140464	0.072979	0.077535	0.054779	0.172197	0.133212	0.117933	0.144474	0.407458	0.185481	0.269033	0.162042	0.311076	0.174759	0.21747	0.377163	0.264181	0.147408	0.30571	0.281335	0.218712	0.24895	0.23104	0.202004	0.1166	0.003092	-3e-05	0.001313	-0.00157	0.001334	0.000438	-0.00084
		80	0.179874	0.215634	0.136775	0.104744	0.137609	0.270065	0.17661	0.186562	0.242887	0.539439	0.274088	0.387423	0.264801	0.383419	0.2788	0.301896	0.527929	0.421052	0.268355	0.369483	0.365787	0.290373	0.382771	0.324777	0.319646	0.180462	0.00688	0.000327	0.000416	-0.00048	0.001545	-0.00044	0.00436
		100	0.287892	0.32753	0.240641	0.112438	0.251567	0.344725	0.260812	0.296821	0.362116	0.874976	0.457333	0.597317	0.387698	0.514834	0.42173	0.421005	0.661888	0.508343	0.405924	0.568854	0.456626	0.37734	0.510488	0.453733	0.39664	0.278354	0.017686	0.001575	0.001762	-0.00167	0.000889	0.000403	0.004319
		120	0.475542	0.454628	0.38747	0.164613	0.470685	0.48349	0.384658	0.594682	0.509673	1.4636	0.724473	1.04515	0.512439	0.654851	0.565558	0.563916	0.993574	0.751037	0.57156	0.68021	0.631023	0.546526	0.657475	0.630801	0.647116	0.473226	0.003301	0.001931	-0.0009	-0.00052	0.001638	0.002033	0.002559
		140	0.715997	0.687719	0.646978	0.456378	0.679573	0.686255	0.59302	0.792651	0.746363	1.42279	0.804862	1.06923	0.706996	0.850732	0.756489	0.743626	1.04844	0.786101	0.776312	0.870539	0.875943	0.820536	0.815297	0.756397	0.772149	0.687465	0.019041	0.002733	-0.00295	-0.00205	0.001662	0.000824	0.020942
		160	1	1	1	1	1	1	1	1	1	1	1	1	1	1	1	1	1	1	1	1	1	1	1	1	1	1	0.034399	0.014944	-0.00384	-0.00203	0.002411	0.001892	0.017585
		Fig. 6f (-80 mmHg)
		WT	W472K	S475K	A476K
		117.4	113.6	106.9	86.37
		114	112.1	105.1	95.37
		123.6	68.31	63.76	108.1
		140.8	99.88	80.31	86.74
		120.4	83.4	104.5	90.59
		114.6	105.4		95
		125.5	88.85		115.6
	Fig. 6f (-80 mmHg)	Unpaired two-tailed t-test with Welch's correction
		WT	W472K	S475K	A476K
	n	7	7	5	7
	SEM	3.48457	6.26588	8.61382	4.1832
	Mean+SEM	125.813	102.2	100.728	101.007
	Mean-SEM	118.844	89.6684	83.5002	92.6411
	P value		0.0047	0.0207	0.0006
	Summary		**	*	***
	Welch-corrected t		3.681	3.252	4.685
	Welch-corrected df		9.387	5.321	11.62
	95% CI		-42.51 to -10.28	-53.67 to -6.756	-37.41 to -13.60
	R2		0.5908	0.6652	0.6538
